# Supplementary material
Source: publisher figshare collection journal article supplement (https://acs.figshare.com/ndownloader/files/4009909)

Supporting Information

***n*-BuLi/LiCH<sub>2</sub>CN–mediated one-carbon homologation of aryl epoxides  
into conjugated allyl alcohols**

Takashi Tomioka\*, Rambabu Sankranti, Tsuyoshi Yamada, and Courtney Clark

*Department of Chemistry and Biochemistry, University of Mississippi, University,  
Mississippi 38677, USA*

tomioka@olemiss.edu

**Table of Contents**

|                                     |    |
|-------------------------------------|----|
| Materials and Methods.....          | S2 |
| General Experimental Procedure..... | S2 |
| Spectral Data.....                  | S3 |
| NMR Spectra of Compounds.....       | S8 |

## Materials and Methods

All experiments were performed in flame-dried glassware fitted with rubber septa under an argon atmosphere. Tetrahydrofuran (THF) was distilled over sodium/benzophenone ketyl. All aryl epoxides except styrene oxide and 2-methyl-3-phenyloxirane were prepared in accordance with literature procedure.<sup>1</sup> Unless otherwise noted, reagents were obtained from commercial sources and used as received. <sup>1</sup>H Nuclear Magnetic Resonance (NMR) spectra were recorded at 300 or 500 MHz. Data are presented as follows: chemical shift (in ppm on the  $\delta$  scale relative to  $\delta$ H 7.26 for the residual protons in CDCl<sub>3</sub>), multiplicity (s = singlet, d = doublet, t = triplet, q = quartet, m = multiplet, br = broad), coupling constant (J/Hz), integration. Coupling constants were taken directly from the spectra and are uncorrected. <sup>13</sup>C NMR spectra were recorded at 75 or 125 MHz, and all chemical shift values are reported in ppm on the  $\delta$  scale, with an internal reference of  $\delta$ C 77.0 for CDCl<sub>3</sub>. Analytical TLC was performed on silica gel plates using UV light and/or potassium permanganate stain followed by heating. Flash column chromatography was performed on silica gel 60A (32-63D).

## General Experimental Procedure

### An original step-wise method for Table 1

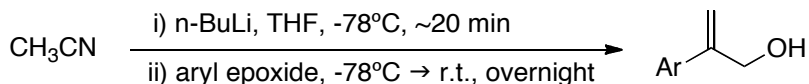

Into a flame-dried 10 mL round-bottomed flask was added dry THF (3.0 mL) under an argon atmosphere. After cooling to  $-78^\circ\text{C}$  (acetone/dry-ice bath), *n*-BuLi (1.64 mL, 2.5 M in hexane, 4.1 mmol) and dry CH<sub>3</sub>CN (110  $\mu\text{L}$ , 2.1 mmol) were slowly added respectively. After stirring for 15–20 min, aryl epoxide (2.0 mmol) was then added. The reaction mixture was gradually warmed up to room temperature overnight and quenched with saturated NaHCO<sub>3</sub> (3 mL). After the phase separation, the aqueous layer was extracted with Et<sub>2</sub>O (x2). The combined organics were washed with brine, dried over MgSO<sub>4</sub>, and concentrated under reduced pressure. The crude product was purified by SiO<sub>2</sub> column chromatography (Hex/EtOAc = 7/3). **Caution:** due to the generation of cyanide ion during the course of the reaction, all operations, including work-up, should be carried out in a fume hood and the cyanide-containing waste should be properly handled and disposed.

### A modified, concise method for Schemes 6 and 7

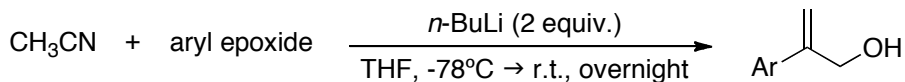

Into a flame-dried 10 mL round-bottomed flask were added aryl epoxide (2.0 mmol), dry CH<sub>3</sub>CN (110  $\mu\text{L}$ , 2.1 mmol), and dry THF (3.0 mL) under an argon atmosphere. After

cooling to  $-78^{\circ}\text{C}$  (acetone/dry-ice bath), *n*-BuLi (1.64 mL, 2.5 M in hexane, 4.1 mmol) was added dropwise. The reaction mixture was then gradually warmed up to room temperature overnight and quenched with saturated  $\text{NaHCO}_3$  (3 mL). After the phase separation, the aqueous layer was extracted with  $\text{Et}_2\text{O}$  (x2). The combined organics were washed with brine, dried over  $\text{MgSO}_4$ , and concentrated under reduced pressure. The crude product was purified by  $\text{SiO}_2$  column chromatography (Hex/EtOAc = 7/3 for **2a** and **2b**, and Hex/EtOAc = 9/1 for **2m**). **Caution:** due to the generation of cyanide ion during the course of the reaction, all operations, including work-up, should be carried out in a fume hood and the cyanide-containing waste should be properly handled and disposed.

### Spectral data

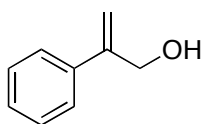

**2-phenylprop-2-en-1-ol (2a):** Column chromatography yielded **2a** as a colorless liquid (215 mg, 80%).  $R_f$  0.30 (Hex/EtOAc = 7/3);  $^1\text{H}$  NMR (300 MHz,  $\text{CDCl}_3$ )  $\delta$  7.47–7.44 (m, 2H), 7.39–7.29 (m, 3H), 5.48 (s, 1H), 5.36 (d,  $J$  = 1.2 Hz, 1H), 4.56 (d,  $J$  = 6.0 Hz, 2H), 1.55 (t,  $J$  = 6.0 Hz, 1H);  $^{13}\text{C}$  NMR (75 MHz,  $\text{CDCl}_3$ )  $\delta$  147.2, 138.5, 128.5, 127.9, 126.0, 112.5, 64.9; HRMS (TOF MS  $\text{ES}^+$ ) calcd for  $\text{C}_9\text{H}_{11}\text{O}$  135.0810  $[\text{M} + \text{H}]^+$ , found 135.0781. The spectral data matched those reported previously.<sup>2</sup>

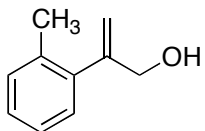

**2-(o-tolyl)prop-2-en-1-ol (2b):** Column chromatography yielded **2b** as a colorless liquid (240 mg, 81%).  $R_f$  0.37 (Hex/EtOAc = 7/3);  $^1\text{H}$  NMR (300 MHz,  $\text{CDCl}_3$ )  $\delta$  7.30–7.10 (m, 4H), 5.49 (d,  $J$  = 1.5 Hz, 1H), 5.06 (d,  $J$  = 1.2 Hz, 1H), 4.31 (d,  $J$  = 6.3 Hz, 2H), 2.32 (s, 3H), 1.75 (t,  $J$  = 6.3 Hz, 1H);  $^{13}\text{C}$  NMR (75 MHz,  $\text{CDCl}_3$ )  $\delta$  149.0, 139.6, 135.4, 130.2, 128.7, 127.5, 125.6, 113.2, 66.1, 19.7; HRMS (TOF MS  $\text{ES}^+$ ) calcd for  $\text{C}_{10}\text{H}_{13}\text{O}$  149.0966  $[\text{M} + \text{H}]^+$ , found 149.0957.

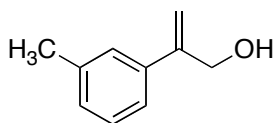

**2-(m-tolyl)prop-2-en-1-ol (2c):** Column chromatography yielded **2c** as a colorless liquid (213 mg, 72%).  $R_f$  0.32 (Hex/EtOAc = 7/3);  $^1\text{H}$  NMR (500 MHz,  $\text{CDCl}_3$ )  $\delta$  7.28–7.23 (m, 3H), 7.15–7.11 (m, 1H), 5.45 (s, 1H), 5.33 (d,  $J$  = 1.0 Hz, 1H), 4.54 (d,  $J$  = 5.5 Hz, 2H), 2.37 (s, 3H), 1.64 (t,  $J$  = 5.5 Hz, 1H);  $^{13}\text{C}$  NMR (125 MHz,  $\text{CDCl}_3$ )  $\delta$  147.4, 138.5, 138.1, 128.7, 128.4, 126.8, 123.2, 112.4, 65.1, 21.5; HRMS (TOF MS  $\text{ES}^+$ ) calcd for  $\text{C}_{10}\text{H}_{13}\text{O}$  149.0966  $[\text{M} + \text{H}]^+$ , found 149.0940.

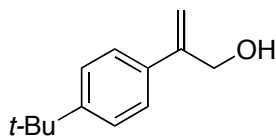

**2-(4-(tert-butyl)phenyl)prop-2-en-1-ol (2d):** Column chromatography yielded **2d** as a colorless liquid (194 mg, 51%).  $R_f$  0.36 (Hex/EtOAc = 7/3);  $^1\text{H}$  NMR (300 MHz,  $\text{CDCl}_3$ )  $\delta$  7.40–7.36 (m, 4H), 5.46 (s, 1H), 5.31 (d,  $J$  = 1.2 Hz, 1H), 4.55 (d,  $J$  = 6.0 Hz, 2H), 1.54 (t,  $J$  = 6.0 Hz, 1H), 1.33 (s, 9H);  $^{13}\text{C}$  NMR (75 MHz,  $\text{CDCl}_3$ )  $\delta$  151.0, 147.0, 135.5, 125.7, 125.4, 111.9, 65.1, 34.5, 31.3. The spectral data matched those reported previously.<sup>3</sup>

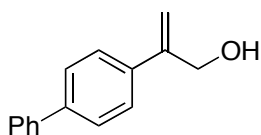

**2-([1,1'-biphenyl]-4-yl)prop-2-en-1-ol (2e):** Column chromatography yielded **2e** as a yellow solid (269 mg, 64%).  $R_f$  0.24 (Hex/EtOAc = 7/3);  $^1\text{H}$  NMR (500 MHz,  $\text{CDCl}_3$ )  $\delta$  7.65–7.30 (m, 9H), 5.54 (s, 1H), 5.39 (d,  $J$  = 1.0 Hz, 1H), 4.60 (d,  $J$  = 6.5 Hz, 2H), 1.56 (t,  $J$  = 6.5 Hz, 1H);  $^{13}\text{C}$  NMR (125 MHz,  $\text{CDCl}_3$ )  $\delta$  146.8, 140.8, 140.6, 137.3, 128.8, 127.4, 127.2, 127.0, 126.5, 112.7, 65.1. The spectral data matched those reported previously.<sup>3</sup>

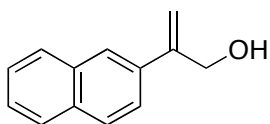

**2-(naphthalen-2-yl)prop-2-en-1-ol (2f):** Column chromatography yielded **2f** as a white solid (261 mg, 71%).  $R_f$  0.28 (Hex/EtOAc = 7/3);  $^1\text{H}$  NMR (300 MHz,  $\text{CDCl}_3$ )  $\delta$  7.90–7.80 (m, 4H), 7.64–7.60 (m, 1H), 7.51–7.45 (m, 2H), 5.63 (s, 1H), 5.47 (d,  $J$  = 0.9 Hz, 1H), 4.68 (d,  $J$  = 5.1 Hz, 2H), 1.55 (t,  $J$  = 5.7 Hz, 1H);  $^{13}\text{C}$  NMR (75 MHz,  $\text{CDCl}_3$ )  $\delta$  147.1, 135.7, 133.4, 133.0, 128.2, 128.1, 127.6, 126.3, 126.1, 124.8, 124.3, 113.2, 65.2. The spectral data matched those reported previously.<sup>4</sup>

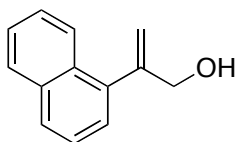

**2-(naphthalen-1-yl)prop-2-en-1-ol (2g):** Column chromatography yielded **2g** as a colorless liquid (284 mg, 77%).  $R_f$  0.30 (Hex/EtOAc = 7/3);  $^1\text{H}$  NMR (300 MHz,  $\text{CDCl}_3$ ):  $\delta$  8.05–8.01 (m, 1H), 7.89–7.79 (m, 2H), 7.52–7.31 (m, 4H), 5.71 (d,  $J$  = 1.5 Hz, 1H), 5.27 (d,  $J$  = 1.5 Hz, 1H), 4.48 (d,  $J$  = 6.0 Hz, 2H), 1.67 (t,  $J$  = 6.3 Hz, 1H);  $^{13}\text{C}$  NMR (75 MHz,  $\text{CDCl}_3$ ):  $\delta$  147.8, 137.9, 133.7, 131.5, 128.3, 127.8, 126.1, 125.8, 125.7, 125.4, 125.2, 114.8, 66.7. The spectral data matched those reported previously.<sup>5</sup>

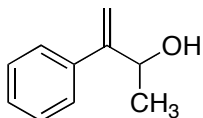

**3-phenylbut-3-en-2-ol (2h):** Column chromatography yielded **2h** as a colorless liquid (193 mg, 65%).  $R_f$  0.36 (Hex/EtOAc = 7/3);  $^1\text{H}$  NMR (500 MHz,  $\text{CDCl}_3$ )  $\delta$  7.40–7.30 (m, 5 H), 5.37 (s, 1 H), 5.28 (s, 1 H), 4.85–4.78 (m, 1 H), 1.68 (d,  $J$  = 3.5 Hz, 1 H), 1.33 (d,  $J$  = 6.5 Hz, 3 H);  $^{13}\text{C}$  NMR (75 MHz,  $\text{CDCl}_3$ )  $\delta$  153.1, 139.9, 128.4, 127.6, 126.8, 111.6, 69.5, 22.6. The spectral data matched those reported previously.<sup>6</sup>

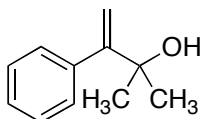

**2-methyl-3-phenylbut-3-en-2-ol (2i):** Column chromatography yielded **2i** as a white solid (211 mg, 65%).  $R_f$  0.42 (Hex/EtOAc = 7/3);  $^1\text{H}$  NMR (300 MHz,  $\text{CDCl}_3$ )  $\delta$  7.33–7.27 (m, 5 H), 5.43 (d,  $J$  = 1.2 Hz, 1 H), 4.97 (d,  $J$  = 0.9 Hz, 1 H), 1.56 (s, 1 H), 1.42 (s, 6 H);  $^{13}\text{C}$  NMR (75 MHz,  $\text{CDCl}_3$ )  $\delta$  157.1, 141.5, 128.8, 127.8, 127.0, 112.5, 73.0, 29.7; HRMS (TOF MS  $\text{ES}^-$ ) calcd for  $\text{C}_{11}\text{H}_{13}\text{O}$  161.0966  $[\text{M} - \text{H}]^-$ , found 161.0945.

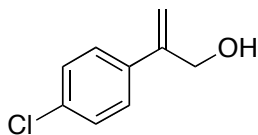

**2-(4-chlorophenyl)prop-2-en-1-ol (2j):** Column chromatography yielded **2j** as a light yellow liquid (148 mg, 44%).  $R_f$  0.25 (Hex/EtOAc = 7/3);  $^1\text{H}$  NMR (300 MHz,  $\text{CDCl}_3$ )  $\delta$  7.41–7.30 (m, 4 H), 5.47 (d,  $J$  = 0.9 Hz, 1 H), 5.37 (d,  $J$  = 0.9 Hz, 1 H), 4.52 (d,  $J$  = 4.8 Hz, 2 H), 1.55 (t,  $J$  = 5.4 Hz, 1 H);  $^{13}\text{C}$  NMR (125 MHz,  $\text{CDCl}_3$ )  $\delta$  146.2, 136.9, 133.8, 128.7, 127.4, 113.3, 65.0. The spectral data matched those reported previously.<sup>2</sup>

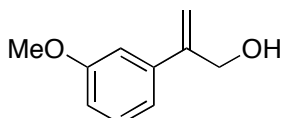

**2-(3-methoxyphenyl)prop-2-en-1-ol (2k):** Column chromatography yielded **2k** as a colorless liquid (197 mg, 60%).  $R_f$  0.24 (Hex/EtOAc = 7/3);  $^1\text{H}$  NMR (300 MHz,  $\text{CDCl}_3$ )  $\delta$  7.31–7.25 (m, 1 H), 7.06–6.98 (m, 2 H), 6.88–6.84 (m, 1 H), 5.47 (d,  $J$  = 0.9 Hz, 1 H), 5.36 (d,  $J$  = 1.2 Hz, 1 H), 4.53 (d,  $J$  = 6.0 Hz, 2 H), 3.83 (s, 3 H), 1.60 (t,  $J$  = 6.0 Hz, 1 H);  $^{13}\text{C}$  NMR (75 MHz,  $\text{CDCl}_3$ )  $\delta$  159.7, 147.2, 140.0, 129.5, 118.6, 113.2, 112.8, 112.1, 65.1, 55.2; HRMS (TOF MS  $\text{ES}^-$ ) calcd for  $\text{C}_{10}\text{H}_{11}\text{O}_2$  163.0759  $[\text{M} - \text{H}]^-$ , found 163.0788.

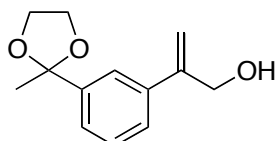

**2-(3-(2-methyl-1,3-dioxolan-2-yl)phenyl)prop-2-en-1-ol (2l):** Column chromatography yielded **2l** as a colorless liquid (287 mg, 65%).  $R_f$  0.17 (Hex/EtOAc = 7/3);  $^1\text{H}$  NMR

(500 MHz, CDCl<sub>3</sub>)  $\delta$  7.57 (s, 1H), 7.45–7.31 (m, 3H), 5.50 (s, 1H), 5.37 (s, 1H), 4.56 (d,  $J$  = 6.0 Hz, 2H), 4.05 (t,  $J$  = 7.0 Hz, 2H), 3.79 (t,  $J$  = 7.0 Hz, 2H), 1.67 (s, 3H), 1.55 (t,  $J$  = 6.0 Hz, 1H); <sup>13</sup>C NMR (75 MHz, CDCl<sub>3</sub>)  $\delta$  147.3, 143.7, 138.5, 128.4, 125.6, 124.9, 122.9, 112.8, 108.8, 65.0, 64.5, 27.7; HRMS (TOF MS ES<sup>+</sup>) calcd for C<sub>13</sub>H<sub>17</sub>O<sub>3</sub> 221.1178 [M + H]<sup>+</sup>, found 221.1151.

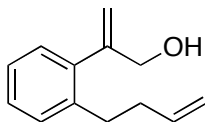

**2-(2-(but-3-en-1-yl)phenyl)prop-2-en-1-ol (2m):** Column chromatography yielded **2m** as a light orange liquid (149 mg, 40%).  $R_f$  0.31 (Hex/EtOAc = 9/1); <sup>1</sup>H NMR (300 MHz, CDCl<sub>3</sub>)  $\delta$  7.26–7.09 (m, 4H), 5.86 (ddt,  $J$  = 16.8, 10.2, 6.6 Hz, 1H), 5.49 (d,  $J$  = 0.9 Hz, 1H), 5.10–4.95 (m, 3H), 4.31 (s, 2H), 2.72 (t, 7.8 Hz, 2H), 2.34 (apparent q,  $J$  = 7.5 Hz, 2H), 1.72 (bs, 1H); <sup>13</sup>C NMR (125 MHz, CDCl<sub>3</sub>)  $\delta$  148.7, 139.4, 139.3, 138.1, 129.2, 129.0, 127.6, 125.7, 114.8, 113.2, 66.6, 35.7, 32.3; HRMS (TOF MS ES<sup>+</sup>) calcd for C<sub>13</sub>H<sub>17</sub>O 189.1279 [M + H]<sup>+</sup>, found 189.1260.

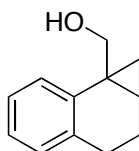

**cyclopropane (9):** The initial column chromatography (Hex/EtOAc = 9/1) separated **2m** and **9**, but **9** was still impure. The second column chromatography (CHCl<sub>3</sub>/EtOAc = 3/1) yielded pure **9** as a white solide (94 mg, 27%).  $R_f$  0.21 (Hex/EtOAc = 9/1),  $R_f$  0.64 (CHCl<sub>3</sub>/EtOAc = 3/1); <sup>1</sup>H NMR (300 MHz, CDCl<sub>3</sub>)  $\delta$  7.59 (d,  $J$  = 7.8 Hz, 1H), 7.22–7.14 (m, 1H), 7.11–7.00 (m, 2H), 4.07 (d,  $J$  = 11.7 Hz, 1H), 3.57 (d,  $J$  = 11.7 Hz, 1H), 2.63 (ddd,  $J$  = 15.9, 5.1, 2.4 Hz, 1H), 2.47 (ddd,  $J$  = 15.9, 12.6, 6.0 Hz, 1H), 2.15–1.98 (m, 2H), 1.86–1.72 (m, 1H), 1.52–1.43 (m, 1H), 0.95 (apparent t,  $J$  = 5.1 Hz, 1H), 0.79 (dd,  $J$  = 8.4, 5.1 Hz, 1H); <sup>13</sup>C NMR (75 MHz, CDCl<sub>3</sub>)  $\delta$  138.2, 135.0, 128.8, 126.3, 126.0, 125.0, 69.0, 26.4, 24.3, 21.5, 19.7, 13.1; HRMS (TOF MS ES<sup>+</sup>) calcd for C<sub>12</sub>H<sub>15</sub>O 175.1123 [M + H]<sup>+</sup>, found 175.1114.

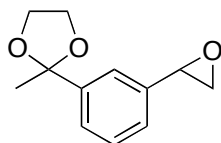

**epoxide (entry 11 in table 1):** The epoxide was prepared from 3-(2-methyl-1,3-dioxolan-2-yl)benzaldehyde<sup>7</sup> and was obtained as a colorless liquid.  $R_f$  0.21 (Hex/EtOAc = 99/1); <sup>1</sup>H NMR (500 MHz, CDCl<sub>3</sub>)  $\delta$  7.45–7.41 (m, 2H), 7.36–7.29 (m, 1H), 7.22–7.18 (m, 1H), 4.08–4.00 (m, 2H), 3.89–3.85 (m, 1H), 3.81–3.74 (m, 2H), 3.15 (dd,  $J$  = 5.4, 4.2 Hz, 1H), 2.83 (dd,  $J$  = 5.4, 2.7 Hz, 1H), 1.65 (s, 3H); <sup>13</sup>C NMR (75 MHz, CDCl<sub>3</sub>)  $\delta$  143.9, 137.7, 128.5, 125.2, 124.9, 122.7, 108.7, 64.5, 64.4, 52.4, 51.1, 27.6; HRMS (TOF MS ES<sup>+</sup>) calcd for C<sub>12</sub>H<sub>15</sub>O<sub>3</sub> 207.1021 [M + H]<sup>+</sup>, found 207.0993.

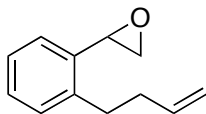

**epoxide (8):** The epoxide was prepared from 2-(but-3-en-1-yl)benzaldehyde<sup>8</sup> and was obtained as a colorless liquid.  $R_f$  0.64 (toluene);  $^1\text{H}$  NMR (300 MHz,  $\text{CDCl}_3$ )  $\delta$  7.30–7.19 (m, 4H), 5.92 (ddt,  $J = 17.1, 10.2, 6.6$  Hz, 1H), 5.14–5.02 (m, 2H), 4.07 (dd,  $J = 3.9, 2.7$  Hz, 1H), 3.17 (dd,  $J = 5.7, 4.2$  Hz, 1H), 2.92–2.85 (m, 2H), 2.72 (dd,  $J = 5.7, 2.7$  Hz, 1H), 2.48–2.38 (m, 2H);  $^{13}\text{C}$  NMR (75 MHz,  $\text{CDCl}_3$ )  $\delta$  140.0, 137.6, 135.4, 128.9, 127.6, 126.3, 124.1, 115.1, 50.3, 50.0, 35.0, 32.0; HRMS (TOF MS  $\text{ES}^+$ ) calcd for  $\text{C}_{12}\text{H}_{15}\text{O}$  175.1123  $[\text{M} + \text{H}]^+$ , found 175.1096.

## References:

- <sup>1</sup> (a) Nielsen, D. K.; Doyle, A. G. *Angew. Chem. Int. Ed.* **2011**, *50*, 6056. (b) Ebner, C.; Muller, C. A.; Markert, C.; Pfaltz, A. *J. Am. Chem. Soc.* **2011**, *133*, 4710.
- <sup>2</sup> Sun, X.; Frimpong, K.; Tan, K. L. *J. Am. Chem. Soc.* **2010**, *132*, 11841.
- <sup>3</sup> Hollingworth, C.; Hazari, A.; Hopkinson, M. N.; Tredwell, M.; Benedetto, E.; Huiban, M.; Gee, A. D.; Brown, J. M.; Gouverneur, V. *Angew. Chem. Int. Ed.* **2011**, *50*, 2613.
- <sup>4</sup> Mo, L.; Xu, L.; Ruan, J.; Liu, S.; Xiao, J. *Chem. Commun.* **2006**, 3591.
- <sup>5</sup> Piel, I.; Steinmetz, M.; Hirano, K.; Frohlich, R.; Grimme, S.; Glorius, F. *Angew. Chem. Int. Ed.* **2011**, *50*, 4983.
- <sup>6</sup> Gao, G.-Y.; Jones, J. E.; Vyas, R.; Harden, J. D.; Zhang, X. P. *J. Org. Chem.* **2006**, *71*, 6655.
- <sup>7</sup> (a) Suh, Y.-G.; Kim, N.-J.; Koo, B.-W.; Lee, K.-O.; Moon, S.-H.; Shi, D.-H.; Jung, J.-W.; Paek, S.-M.; Chang, D.-J.; Li, F.; Kang, H.-J.; Le, T. V. T.; Chae, Y. N.; Shin, C. Y.; Kim, M.-K.; Lim, J. I.; Ryu, J.-S.; Park, H.-J. *J. Med. Chem.* **2008**, *51*, 6318. (b) Chun, J.; Yin, Y. I.; Yang, G.; Tarassishin, L.; Li, Y.-M. *J. Org. Chem.* **2004**, *69*, 7344.
- <sup>8</sup> Watson, I. D. G.; Ritter, S.; Toste, F. D. *J. Am. Chem. Soc.* **2009**, *131*, 2058.

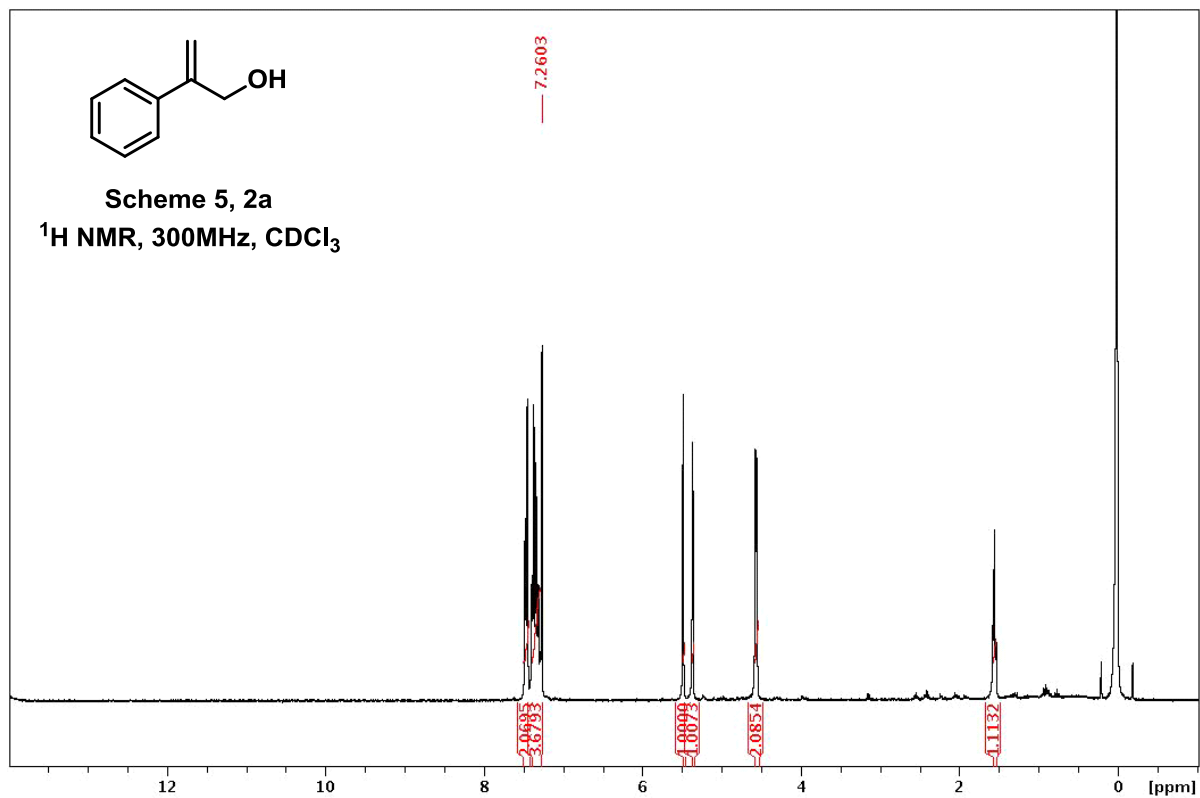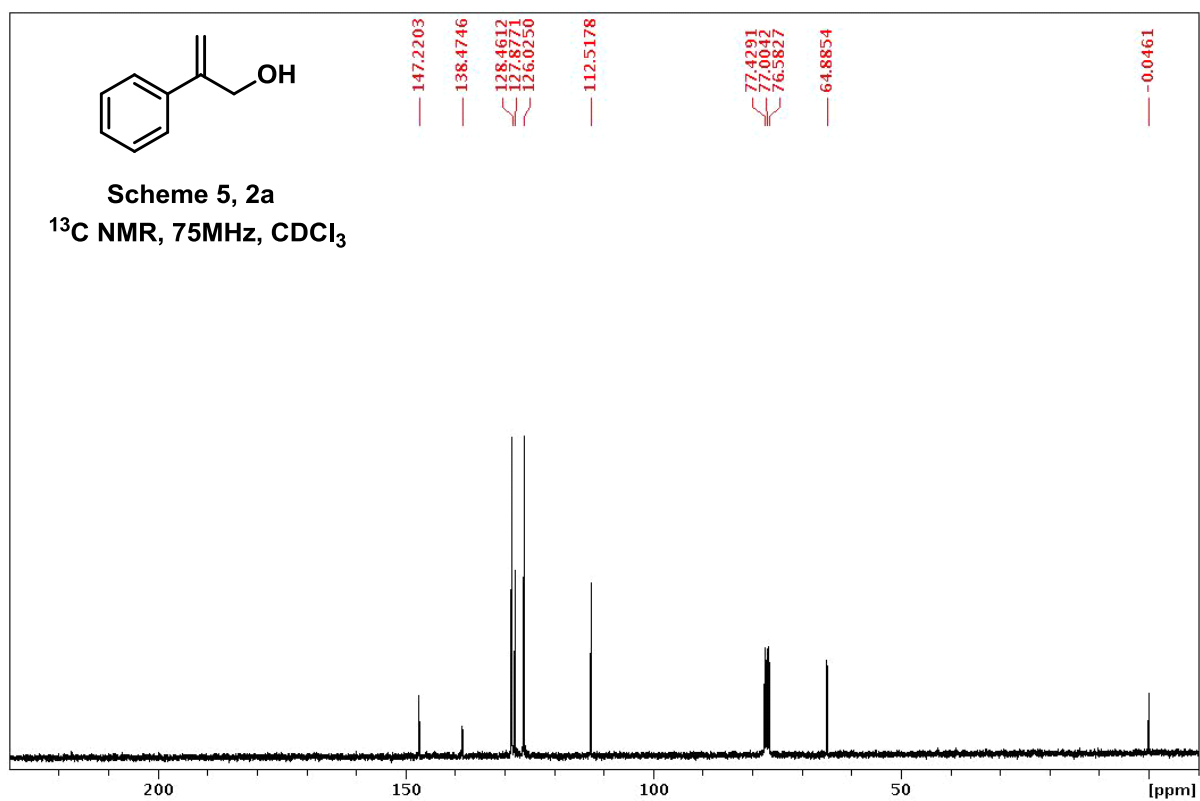



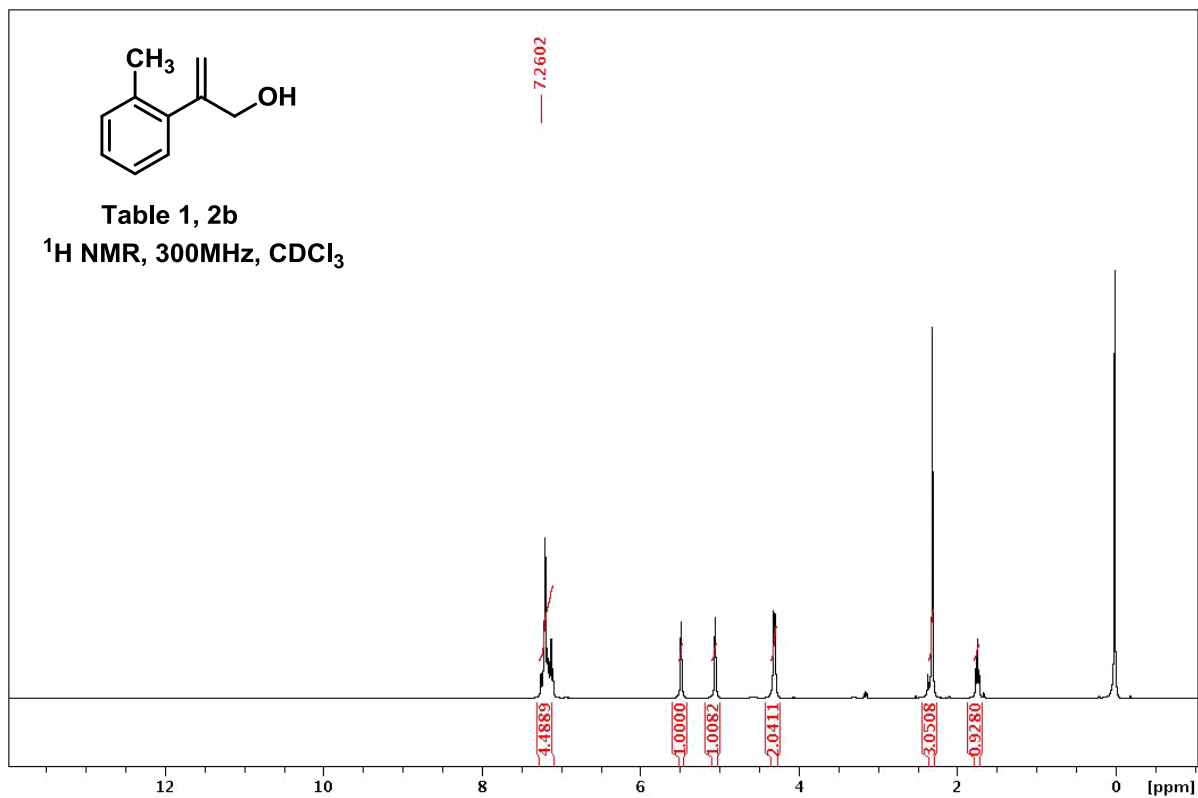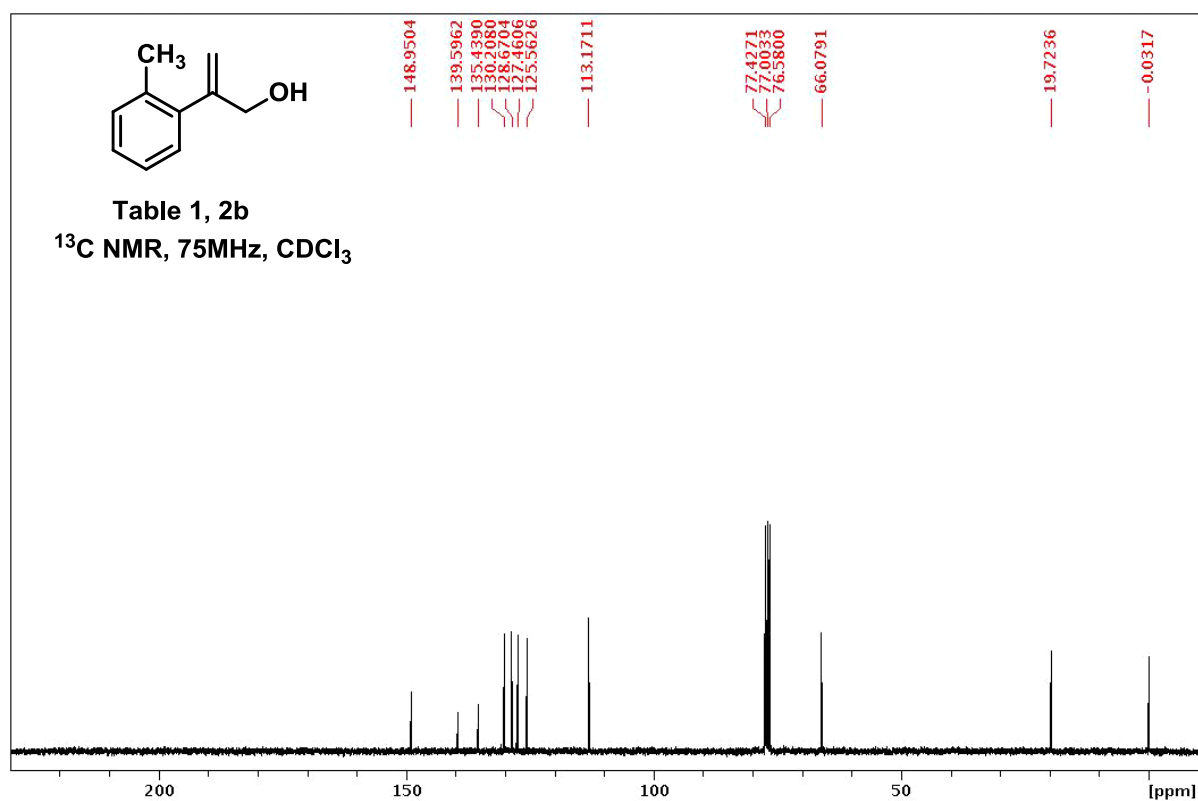

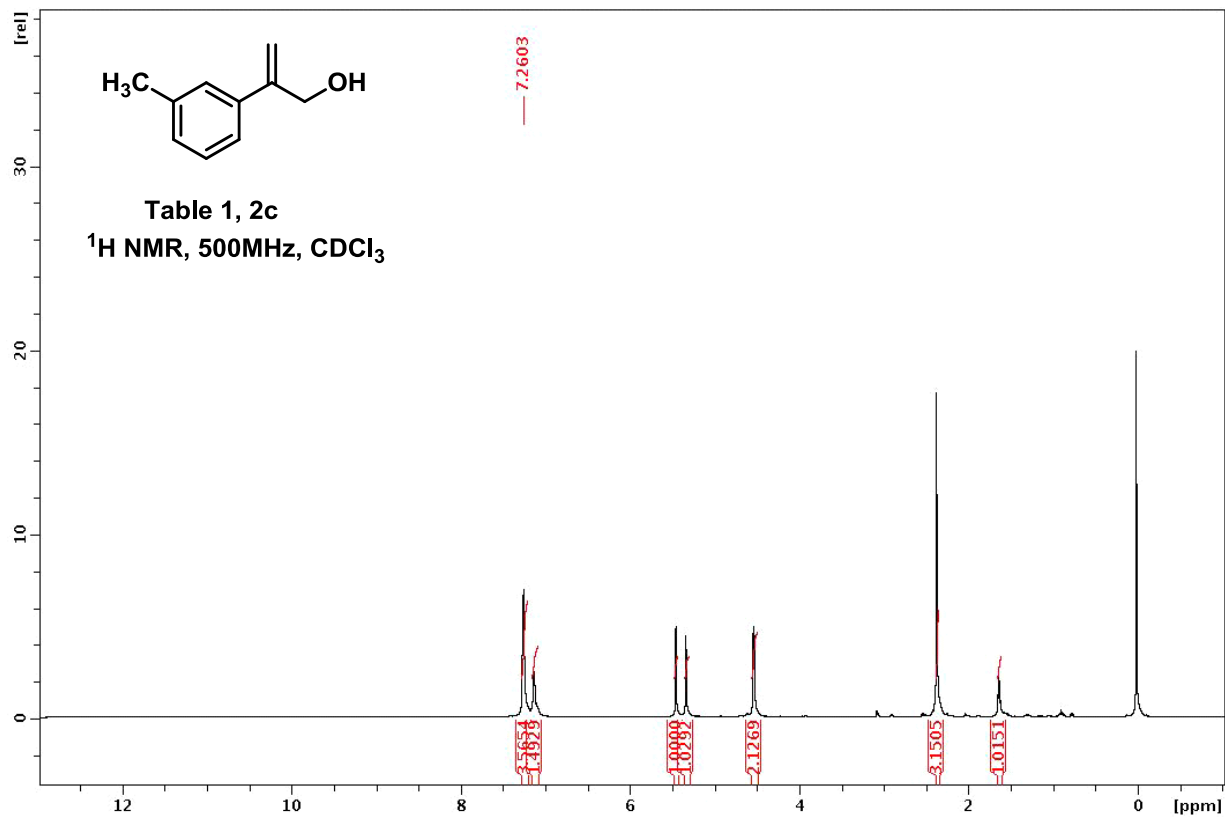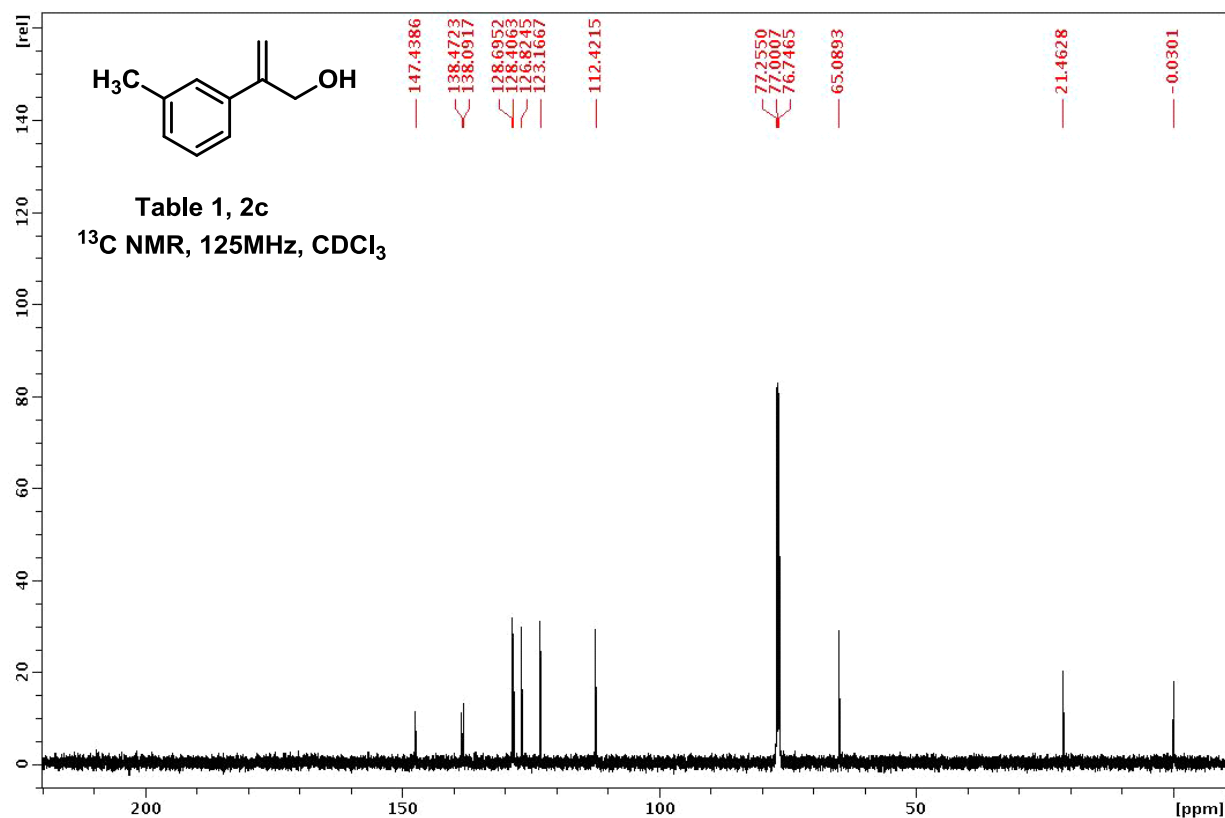

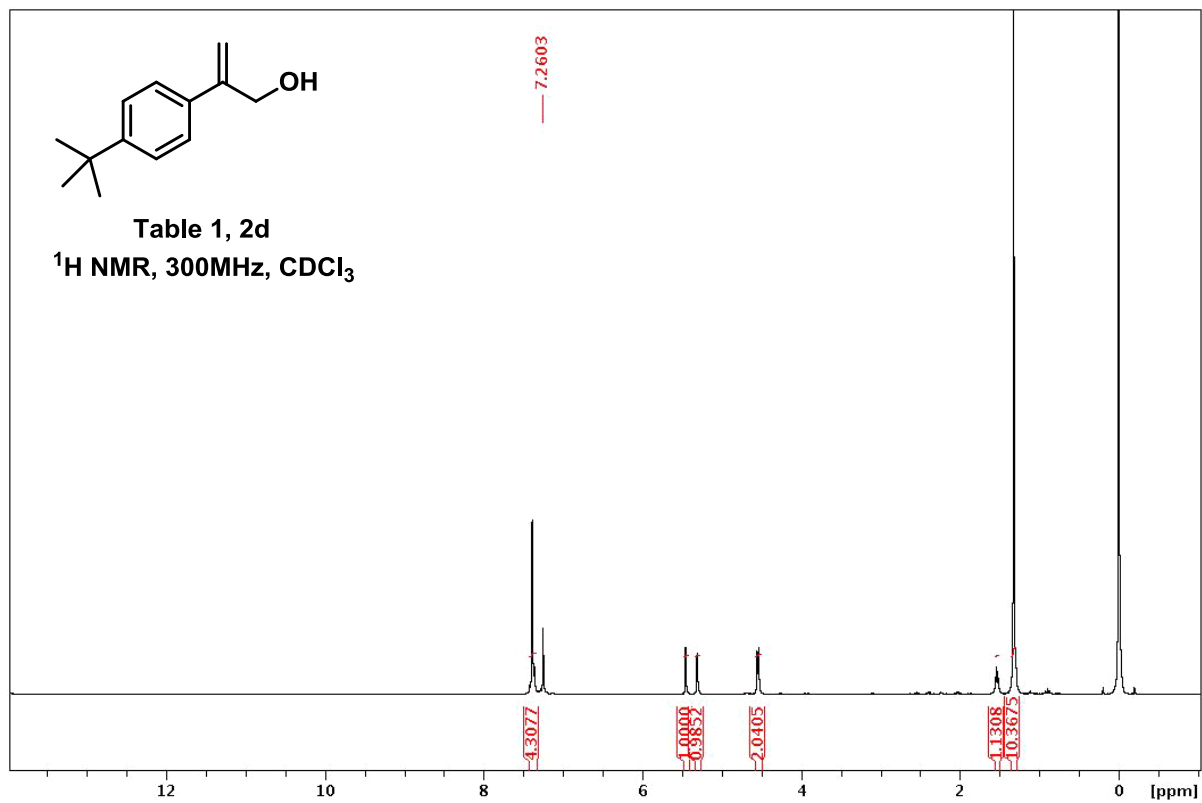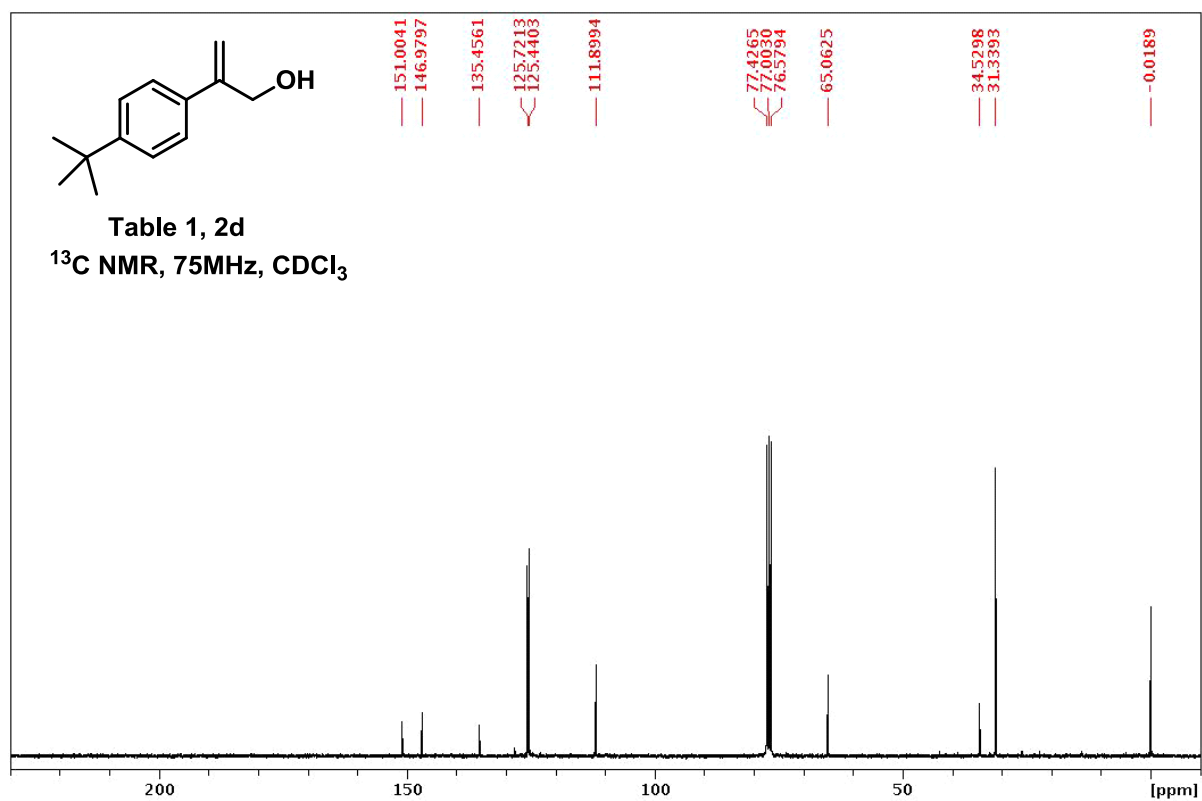

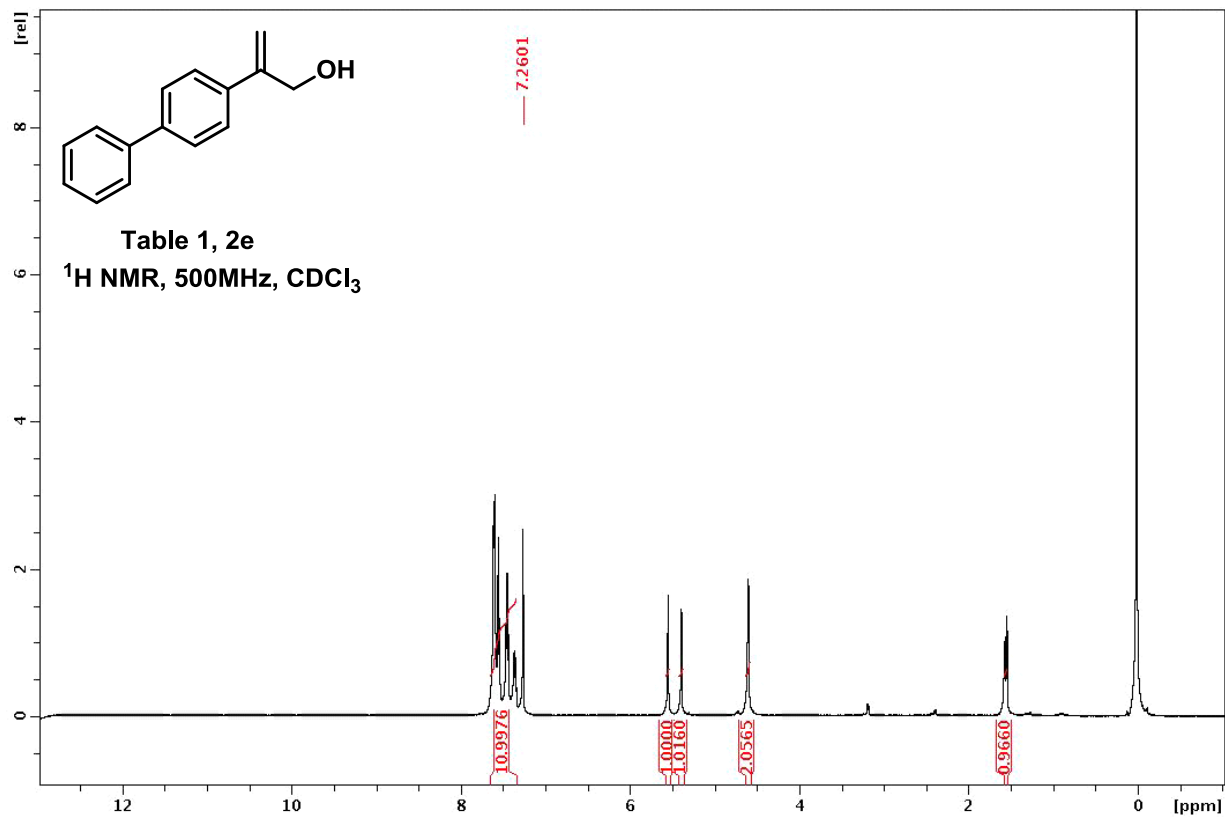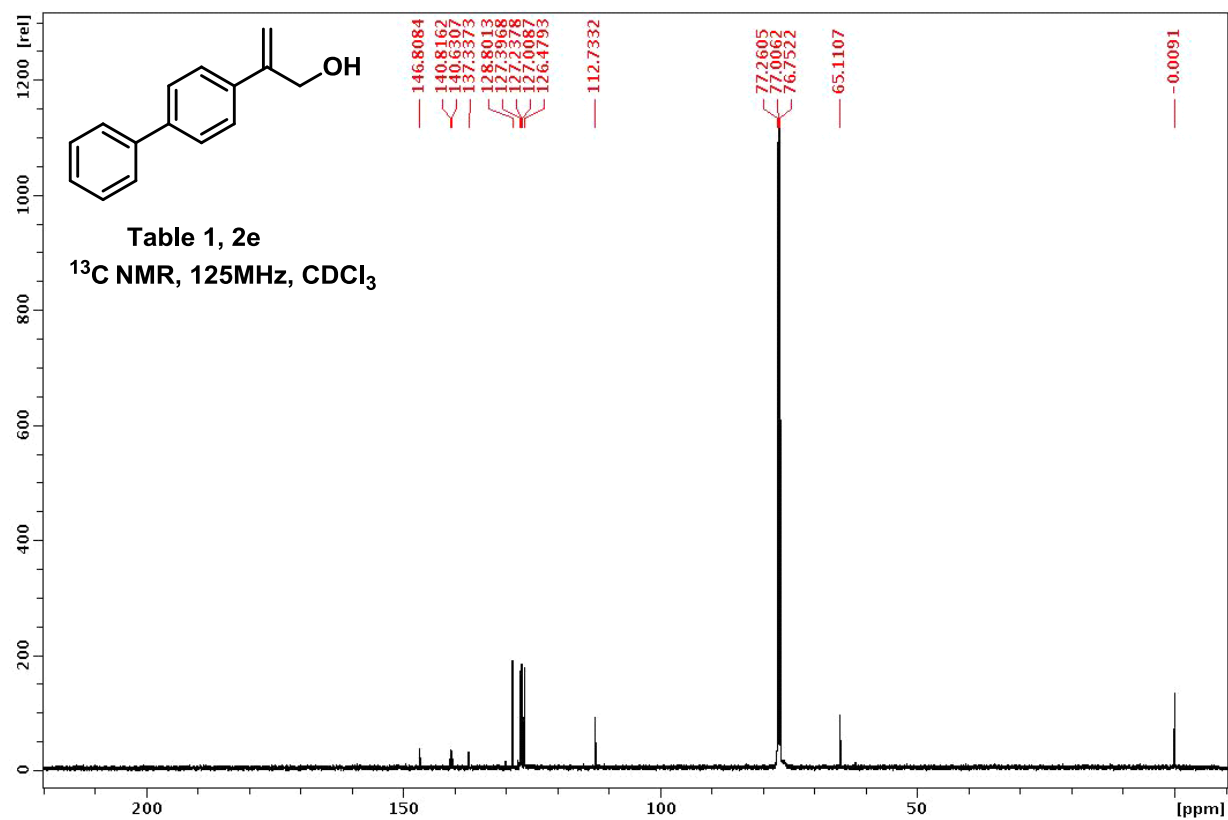

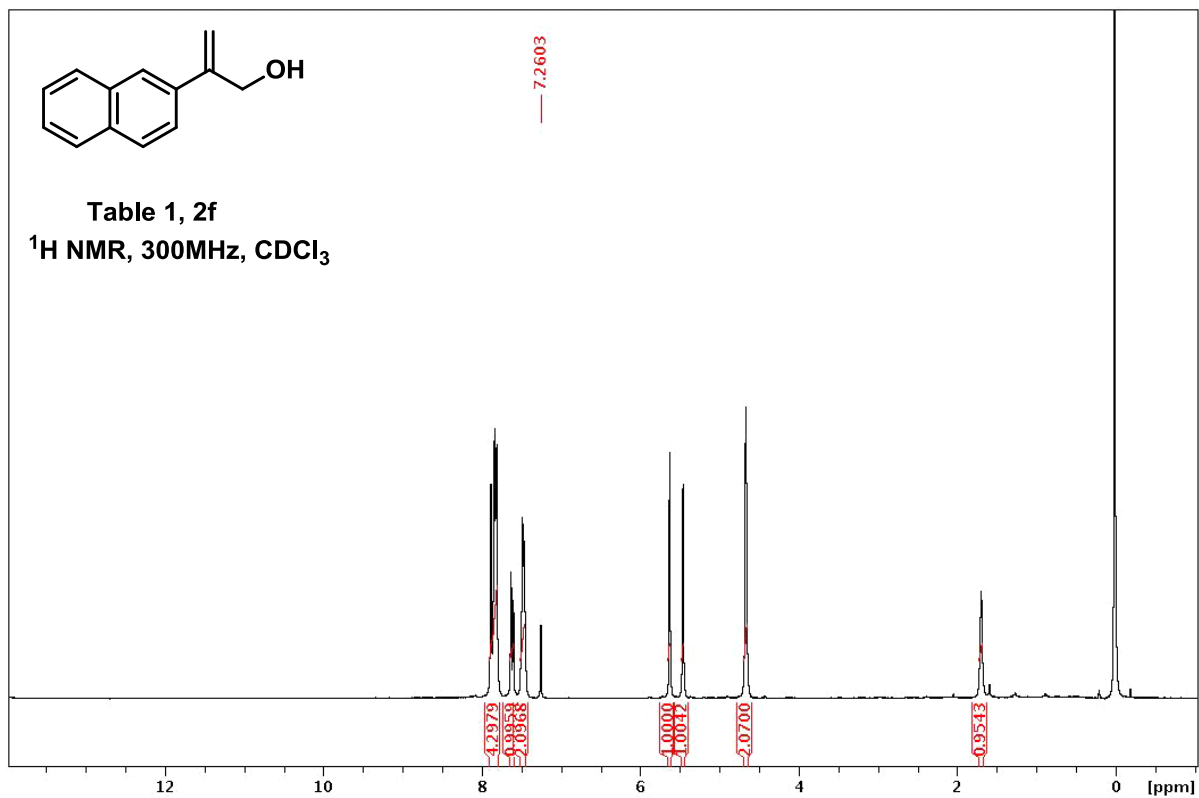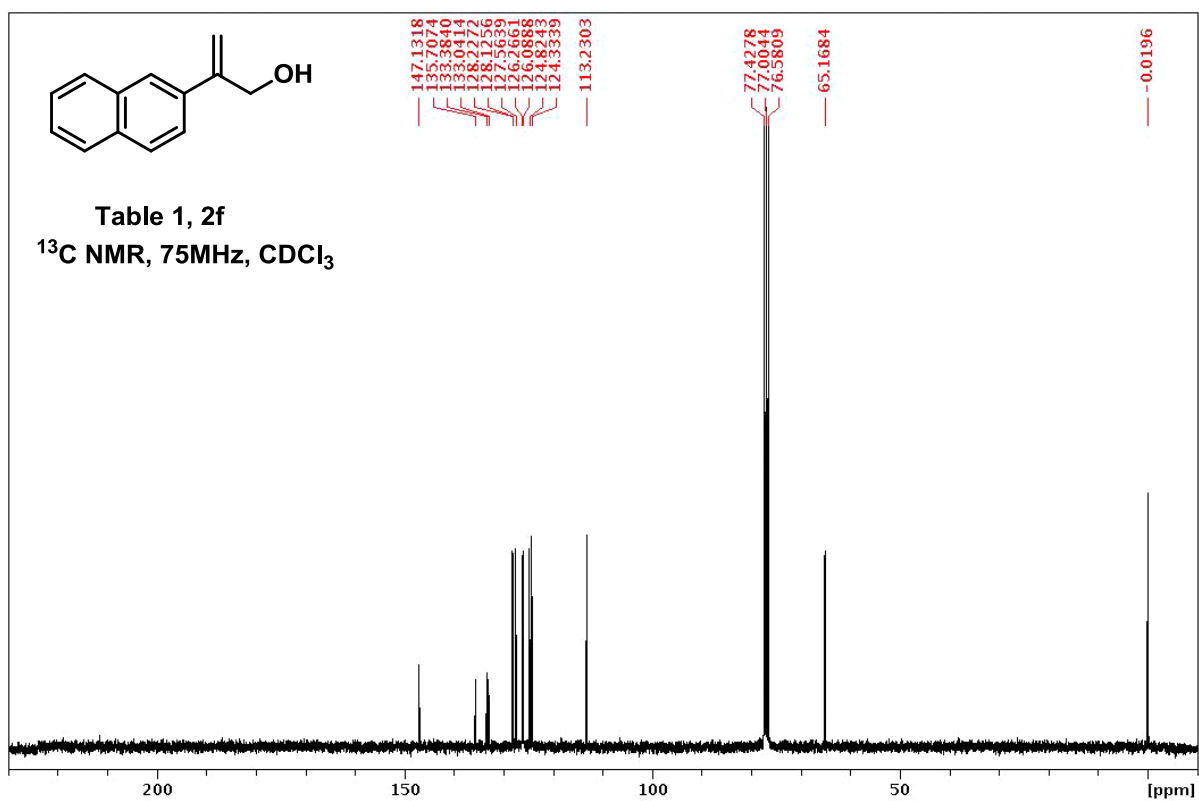

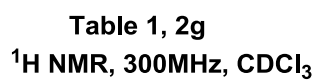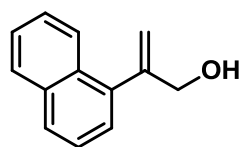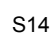

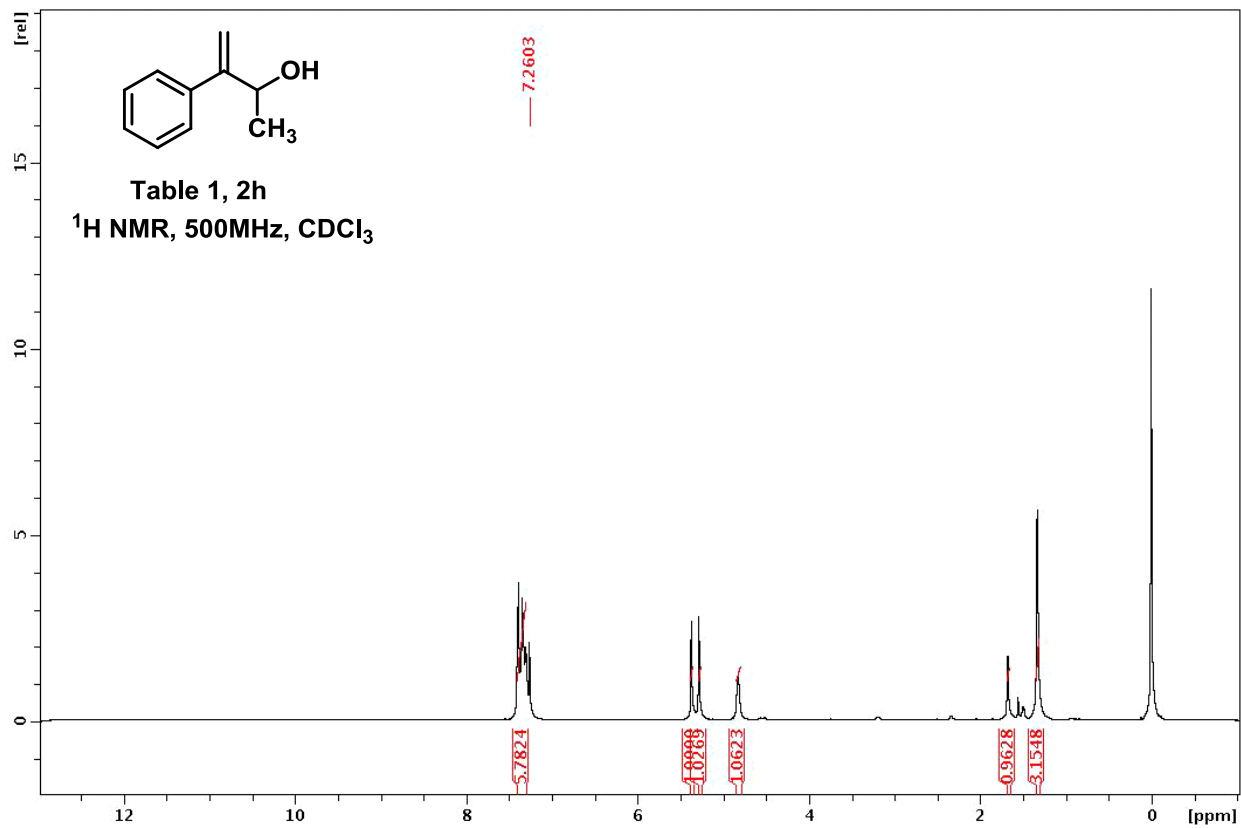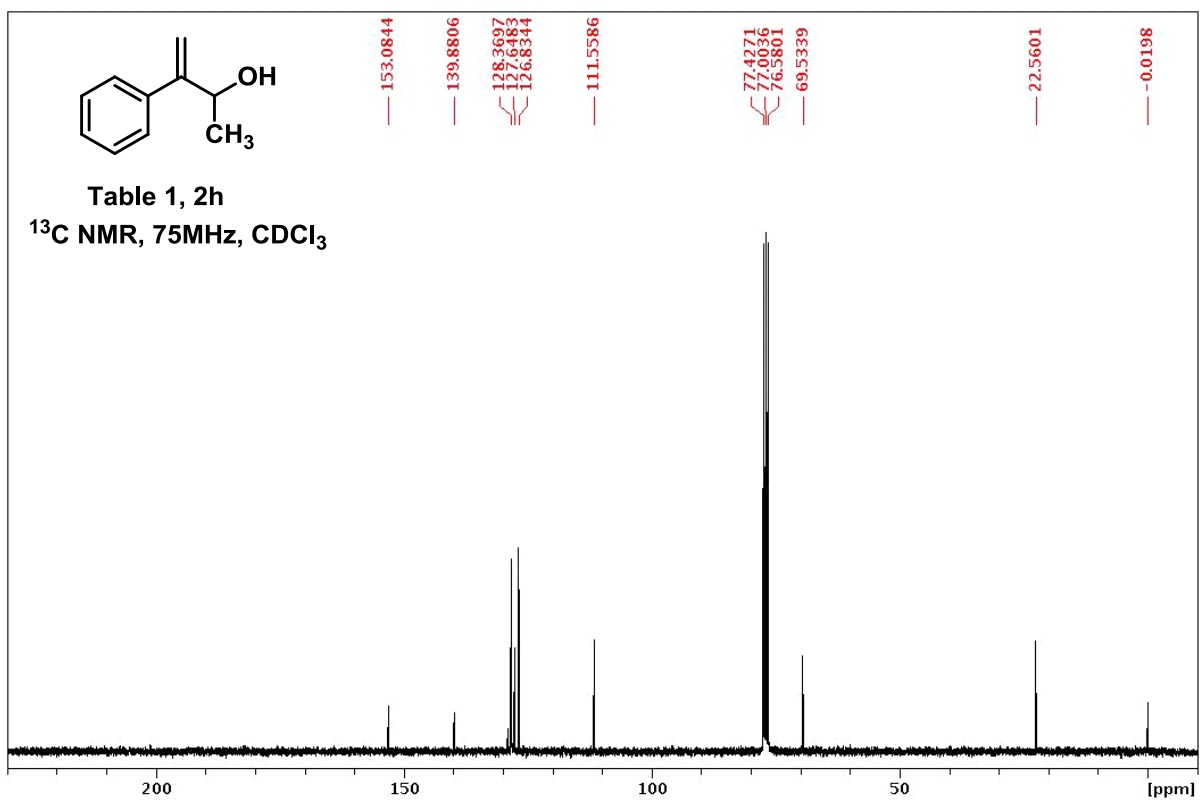

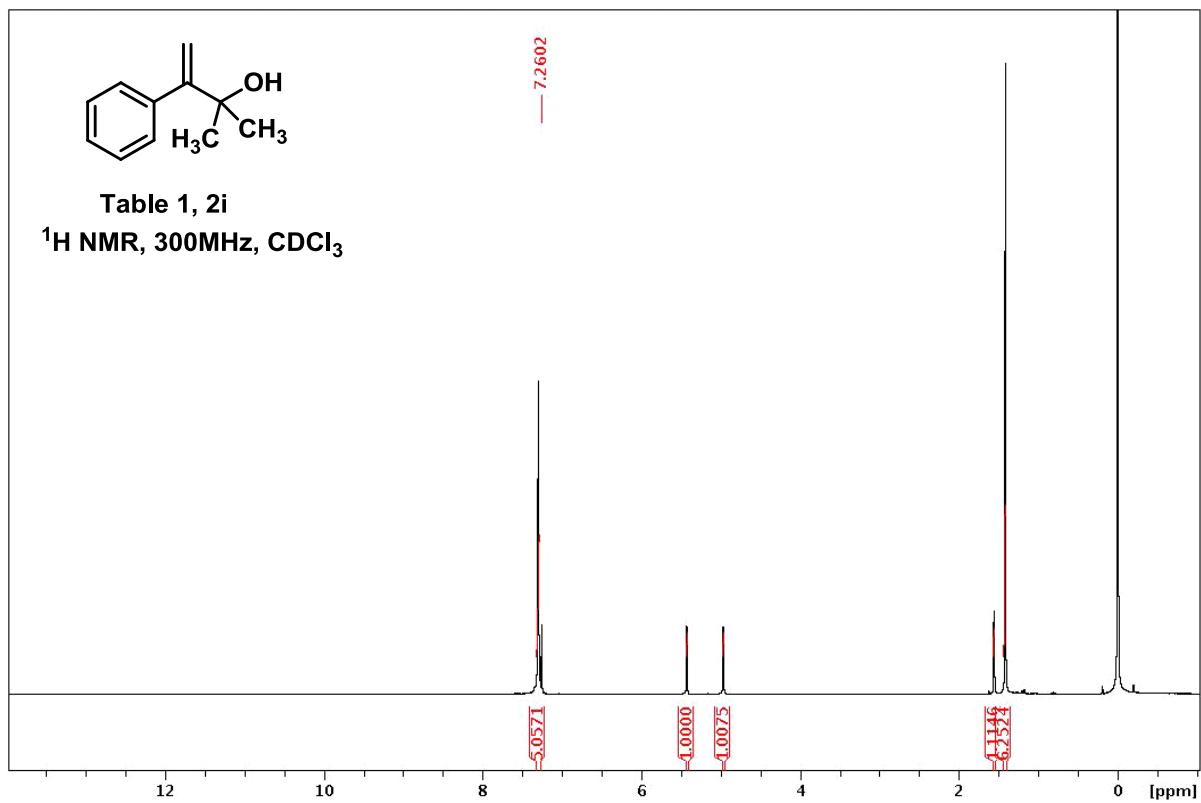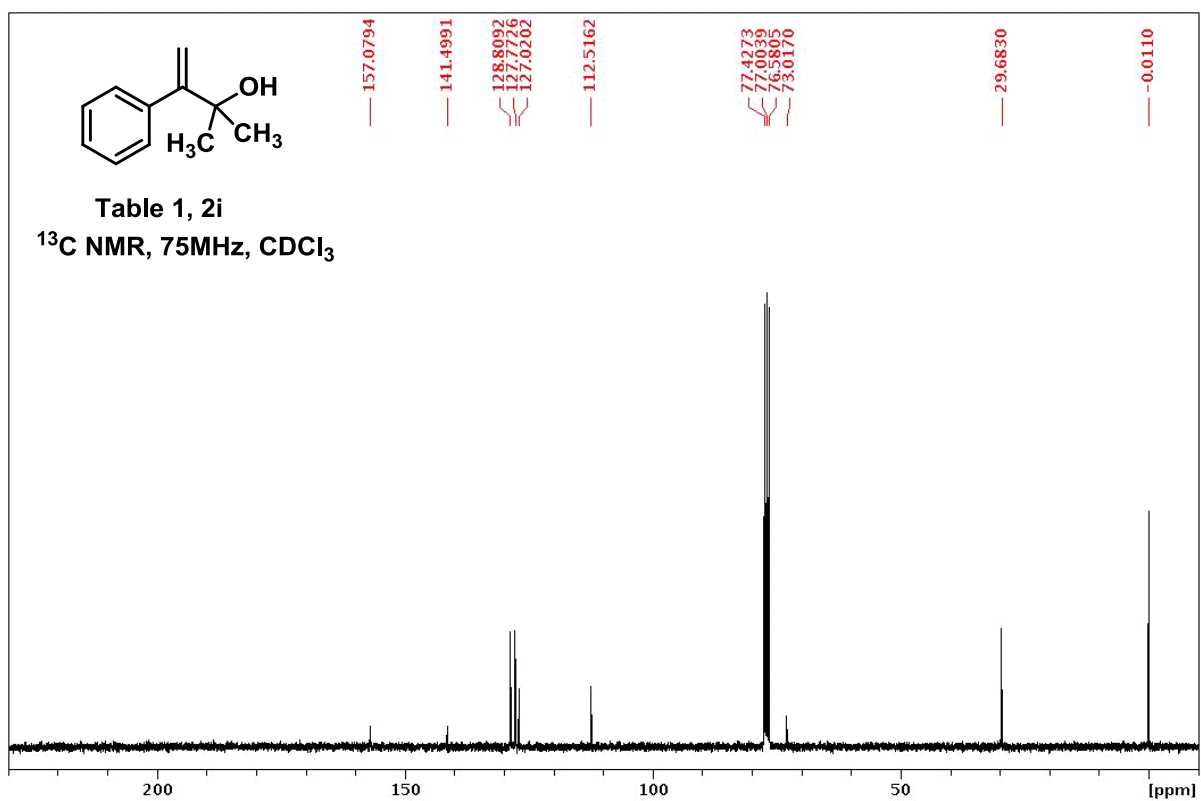



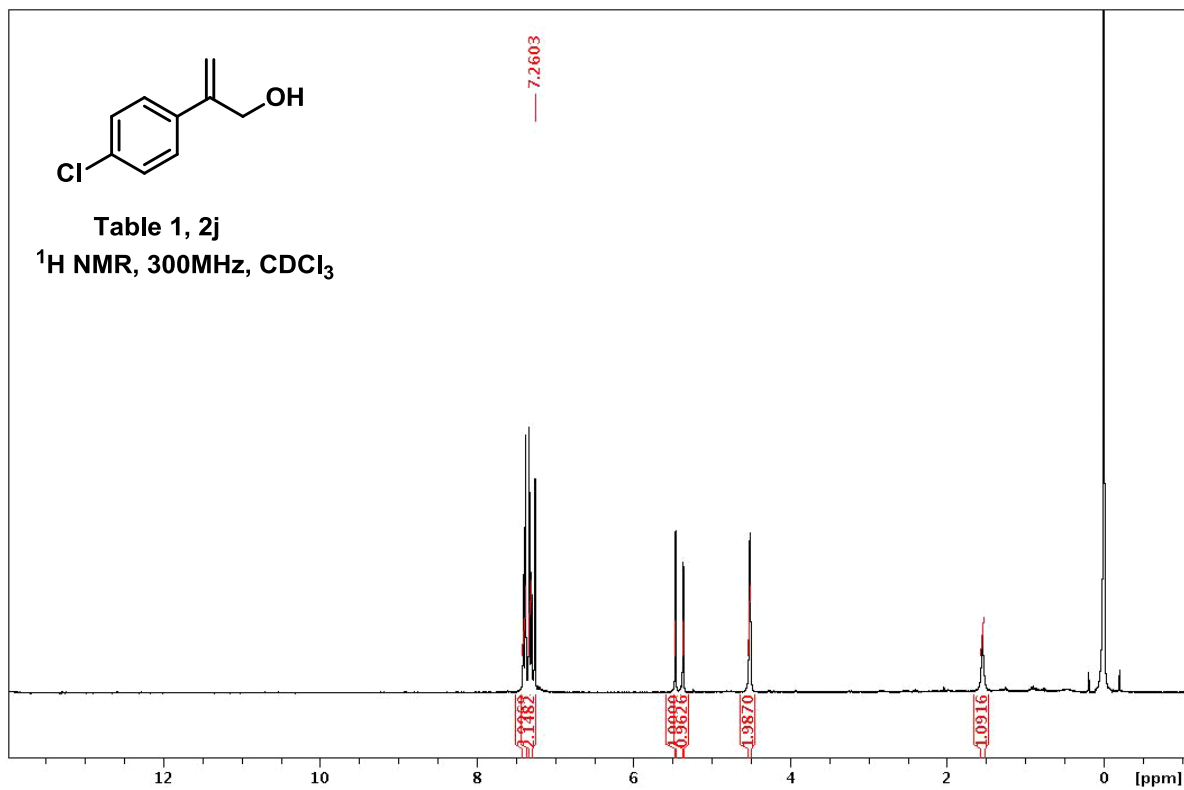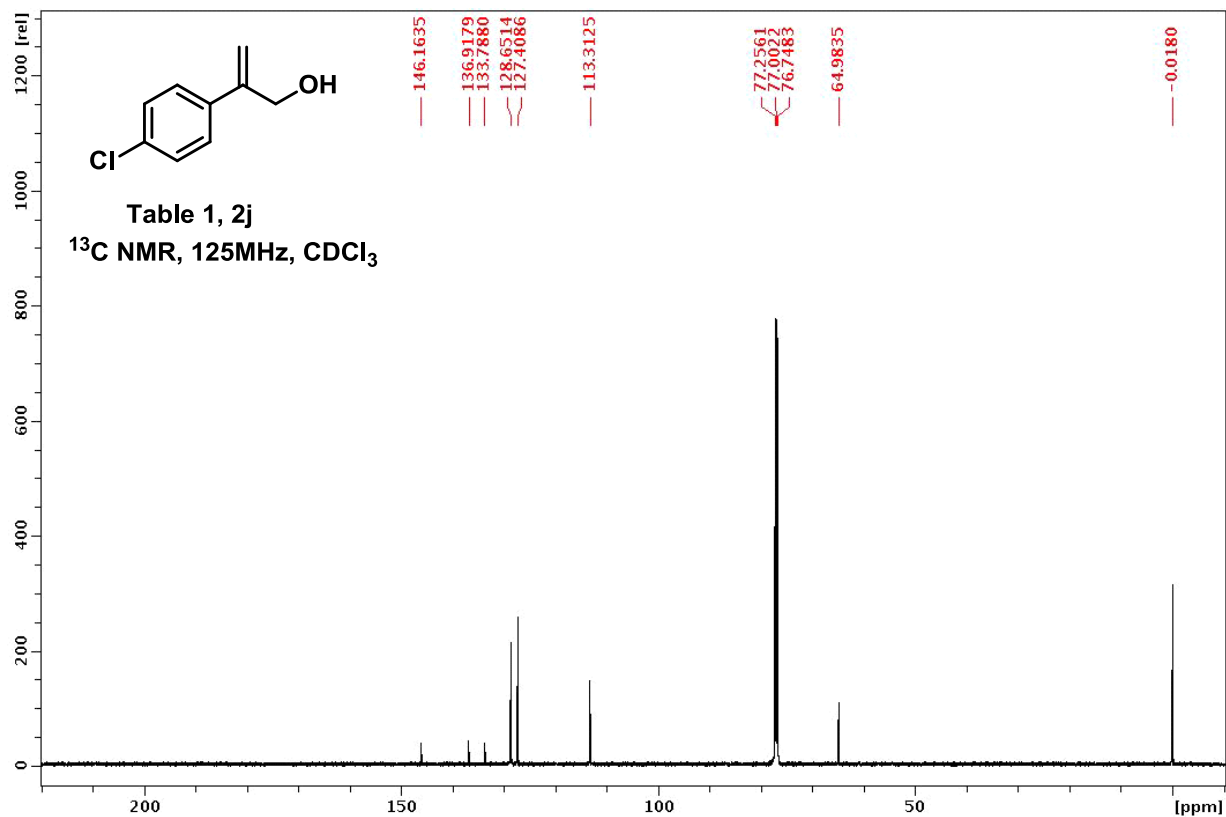

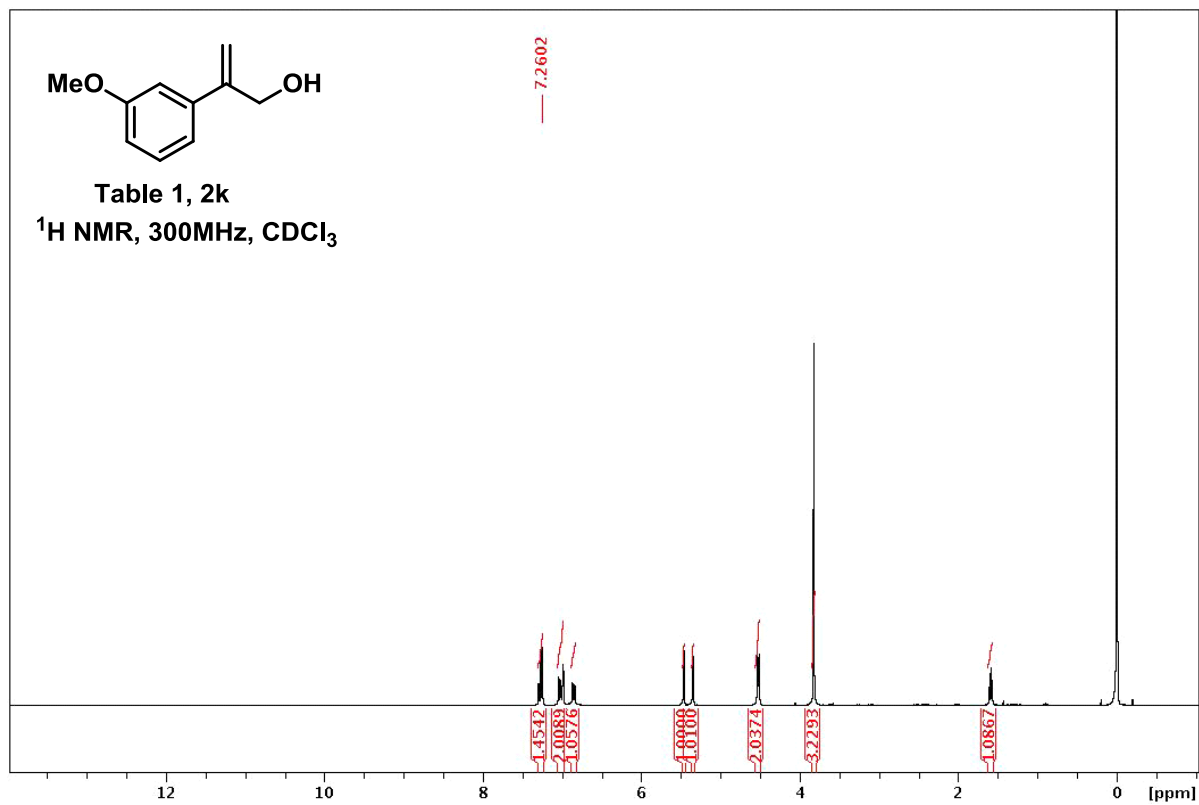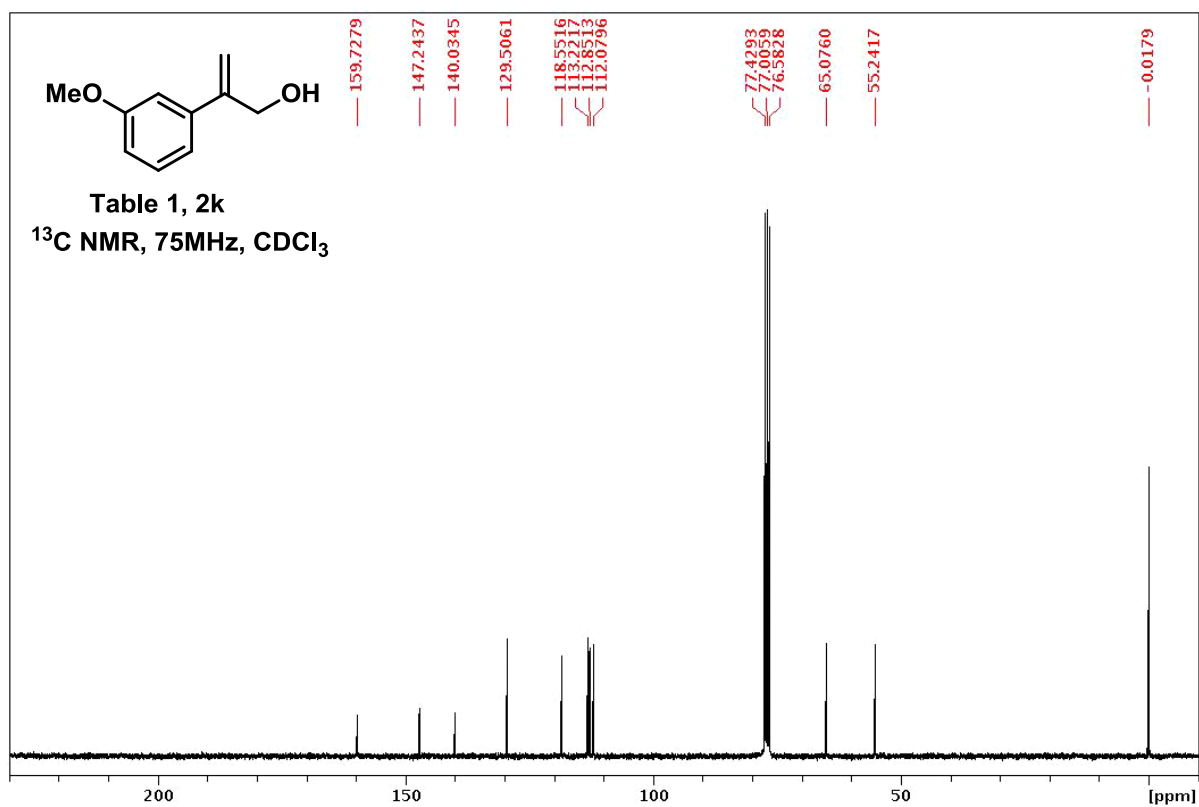

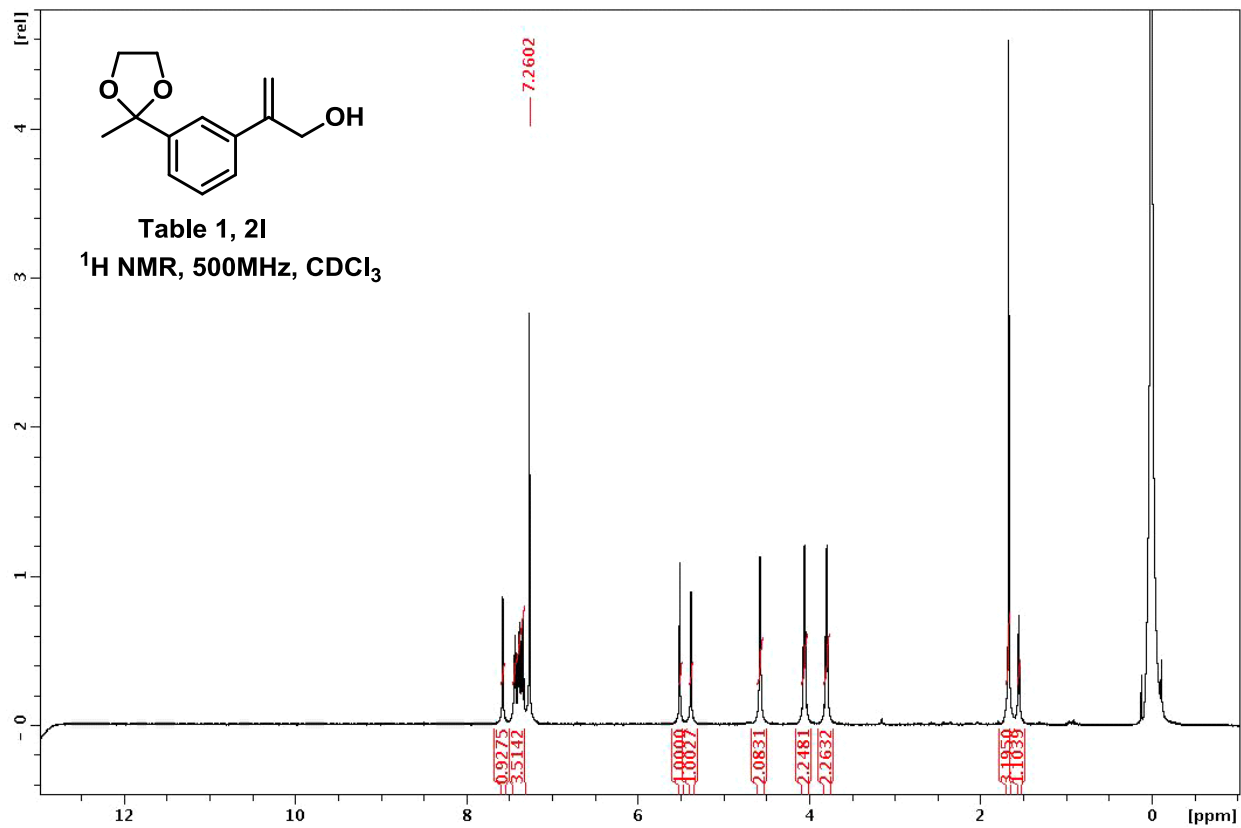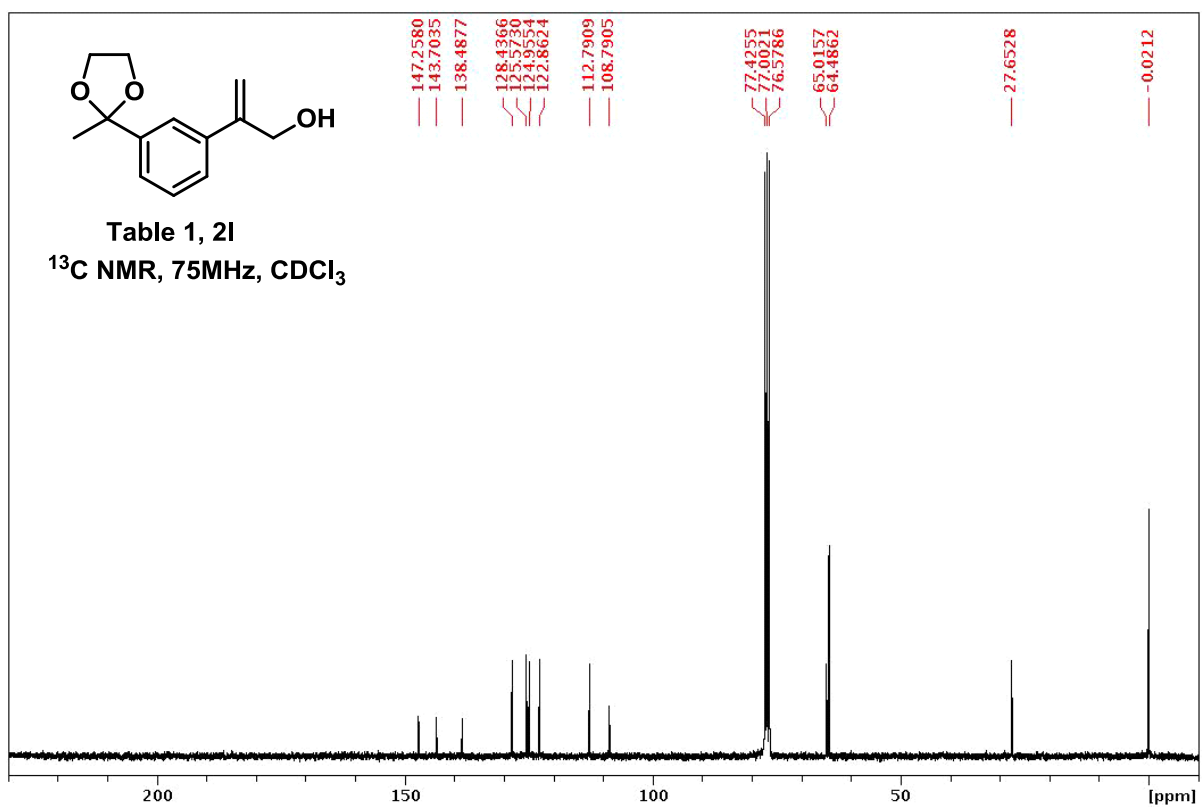

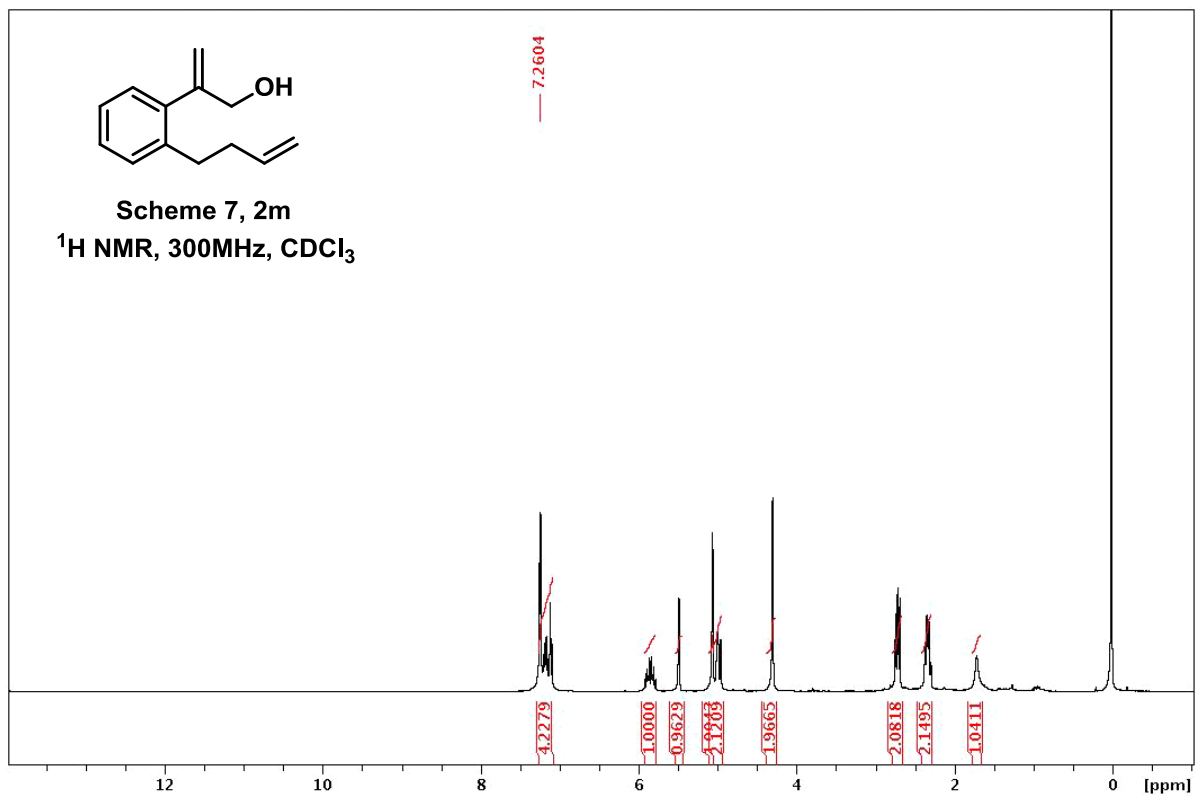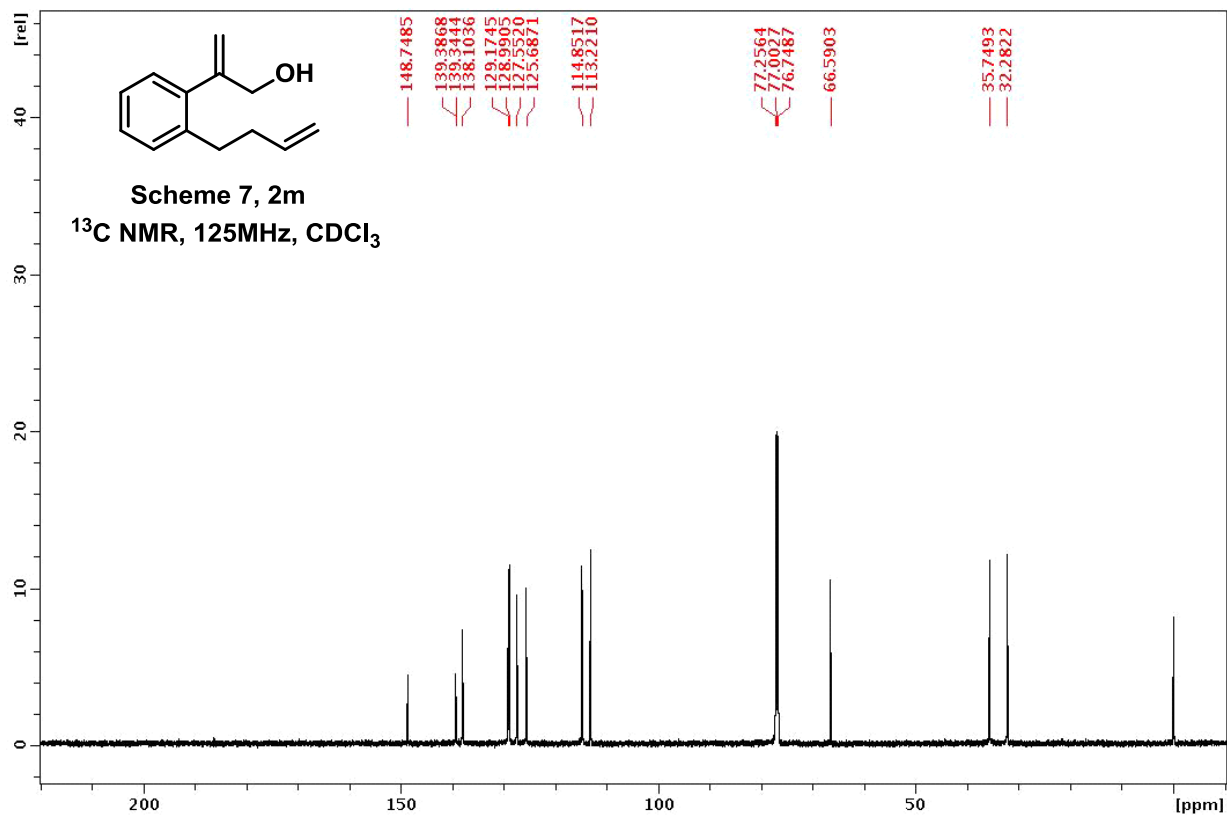

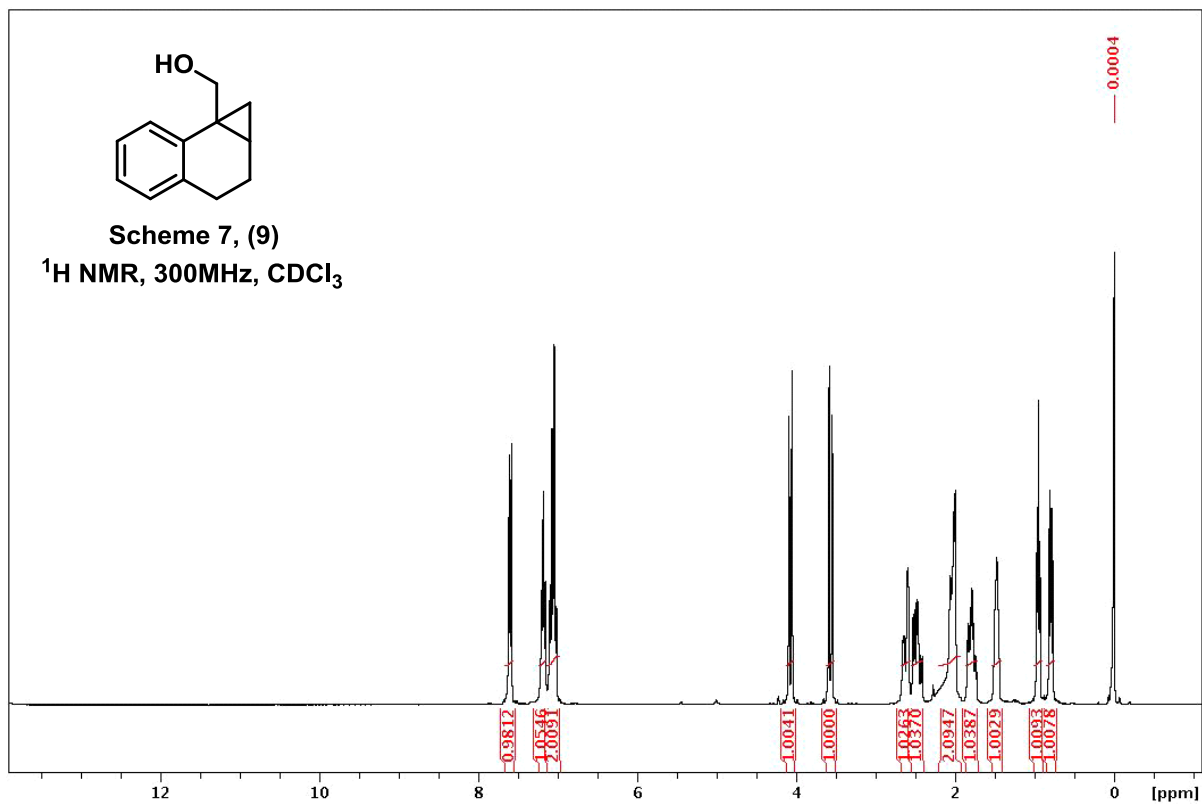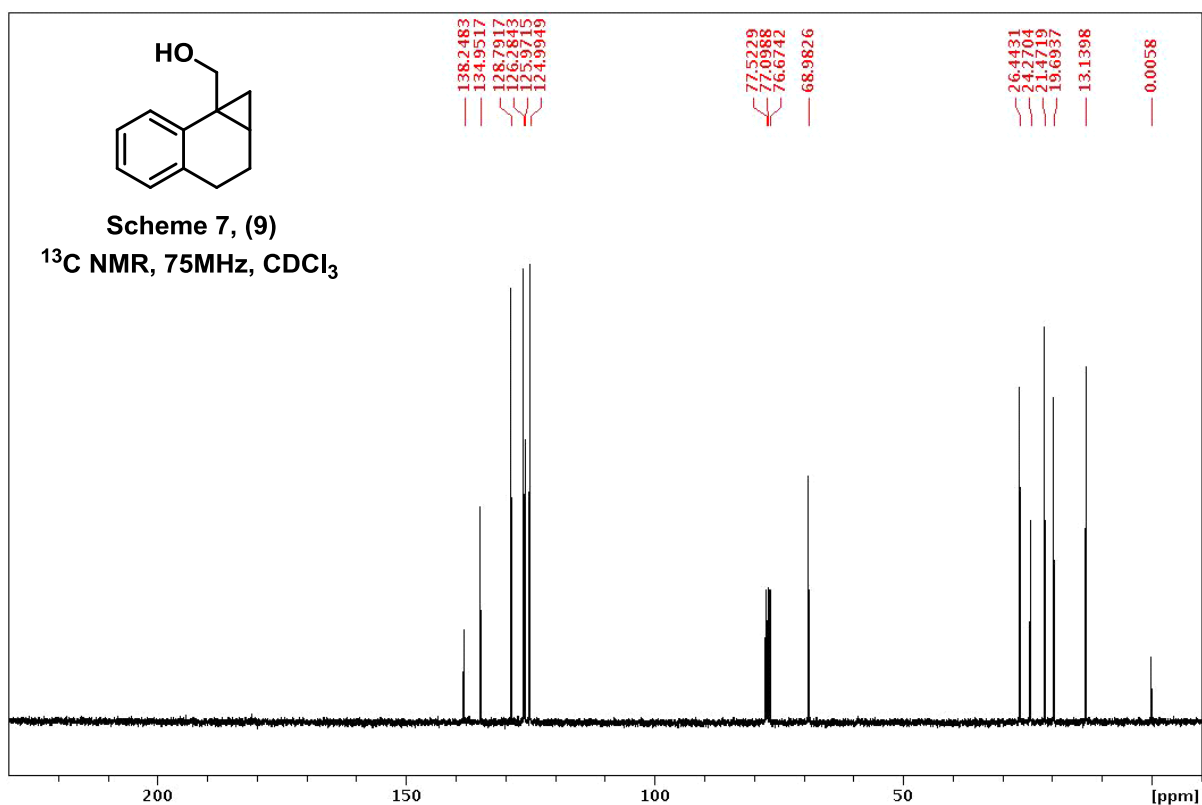

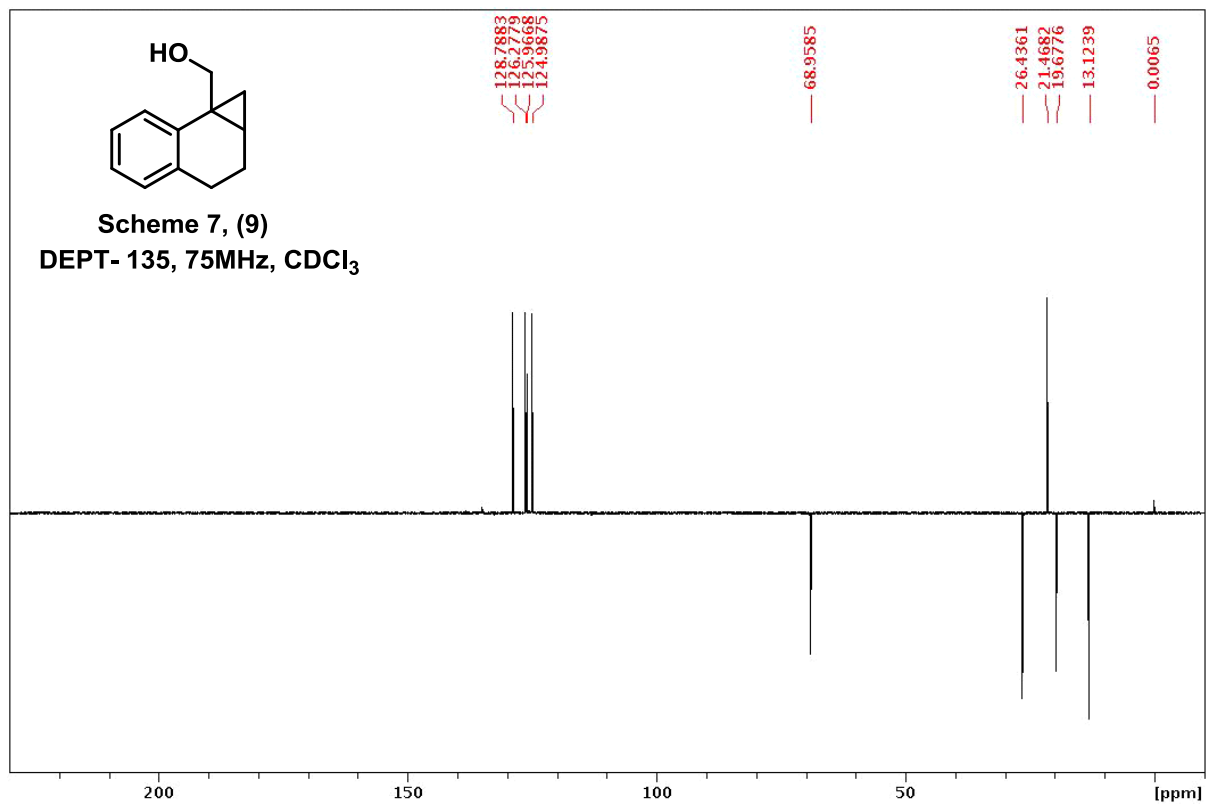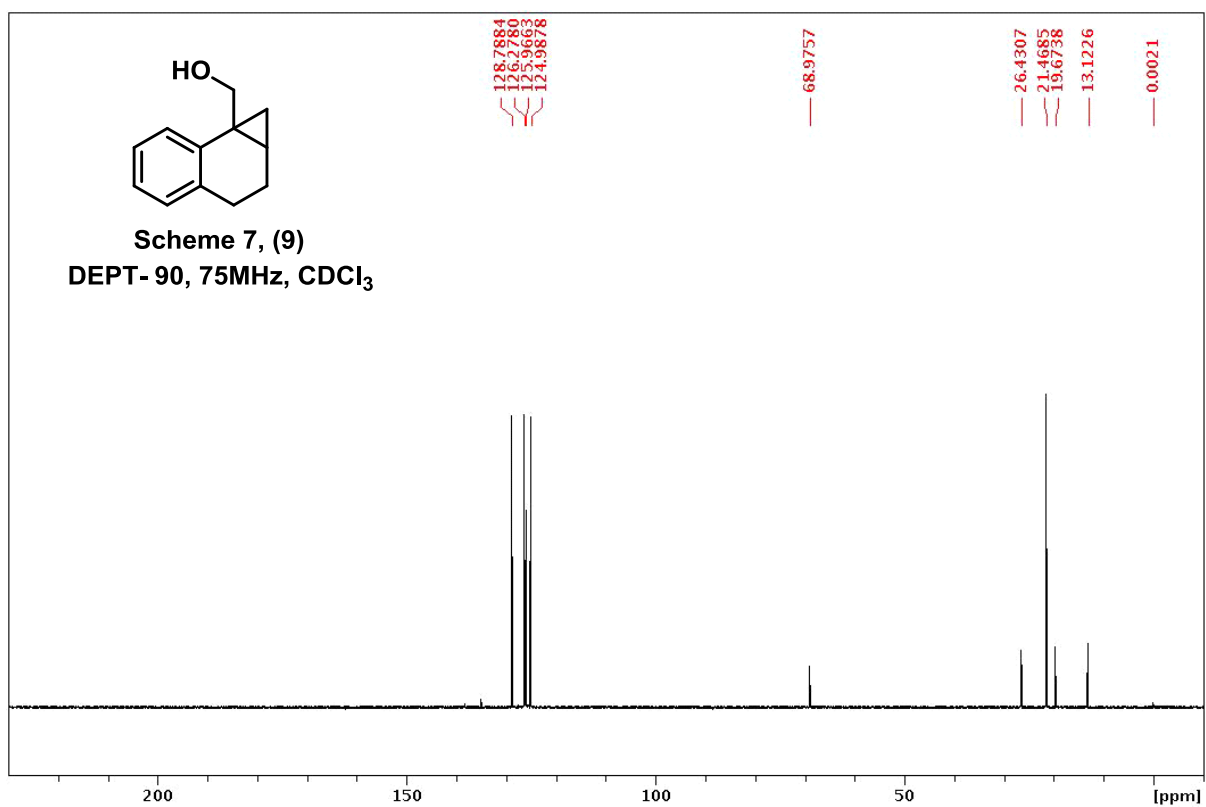

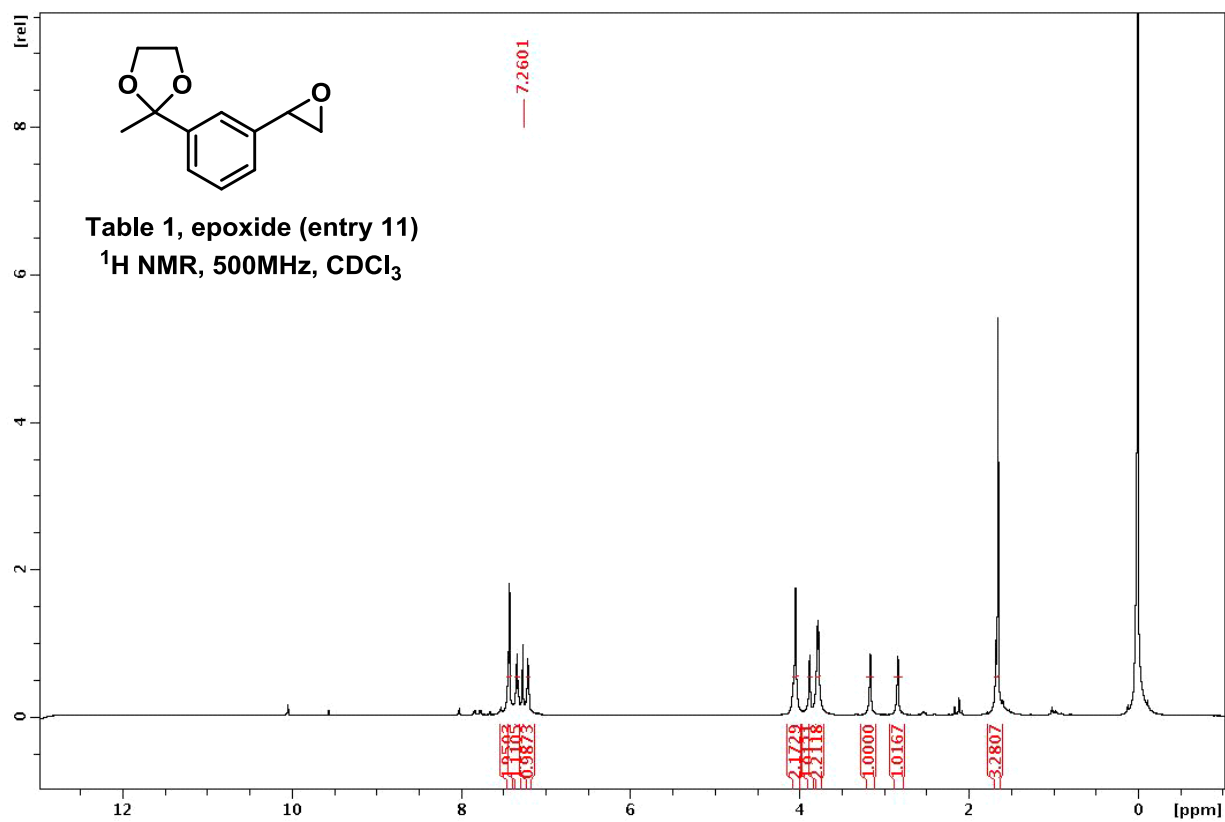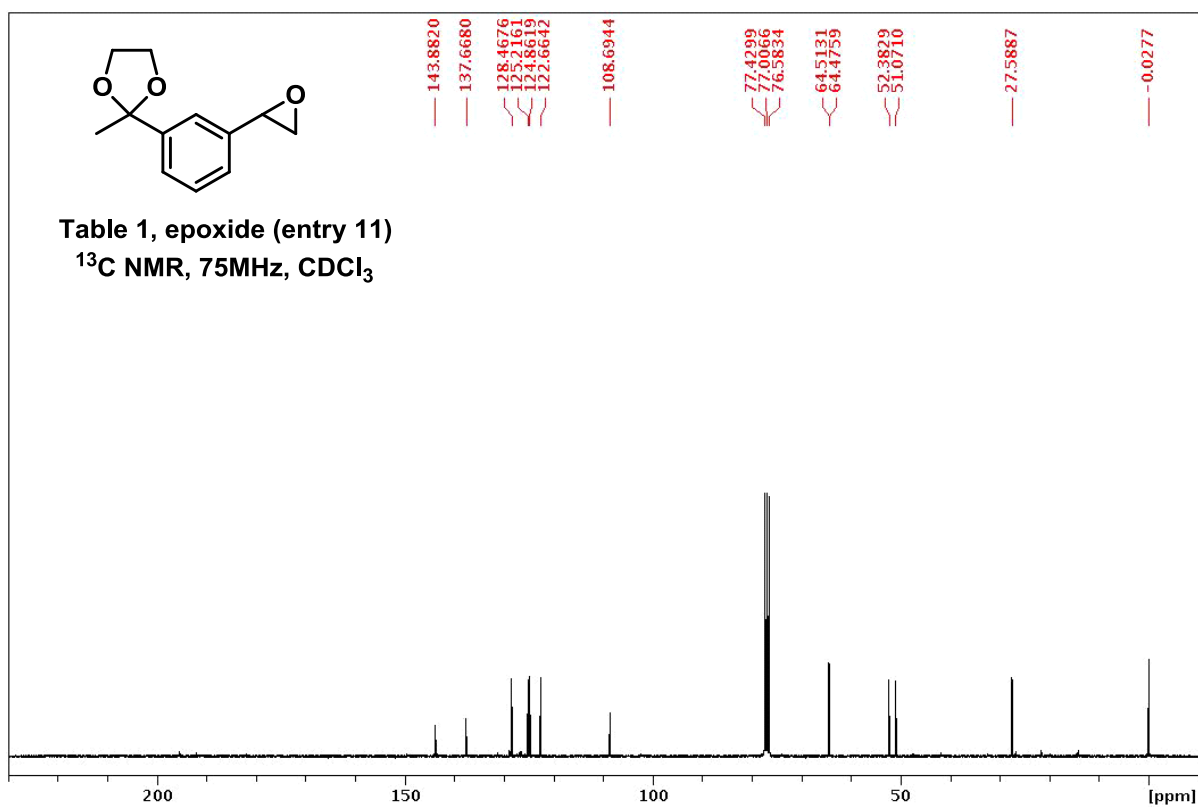

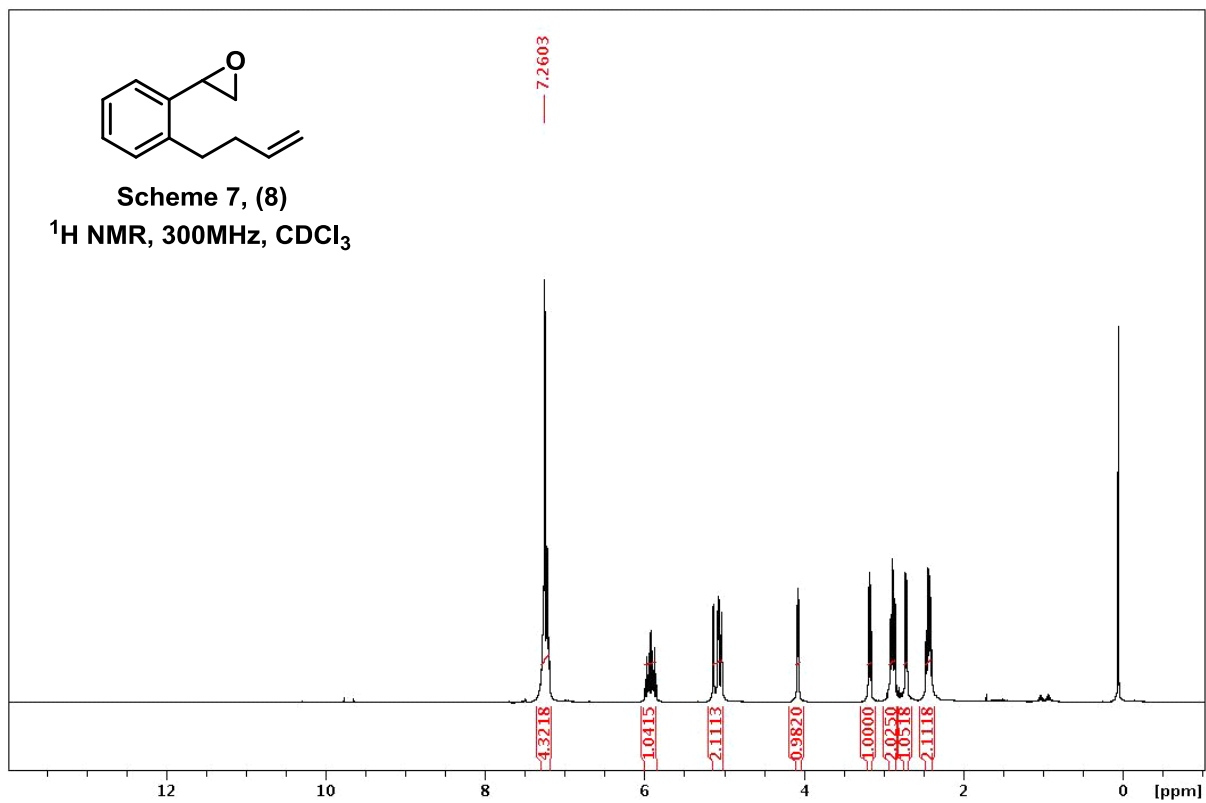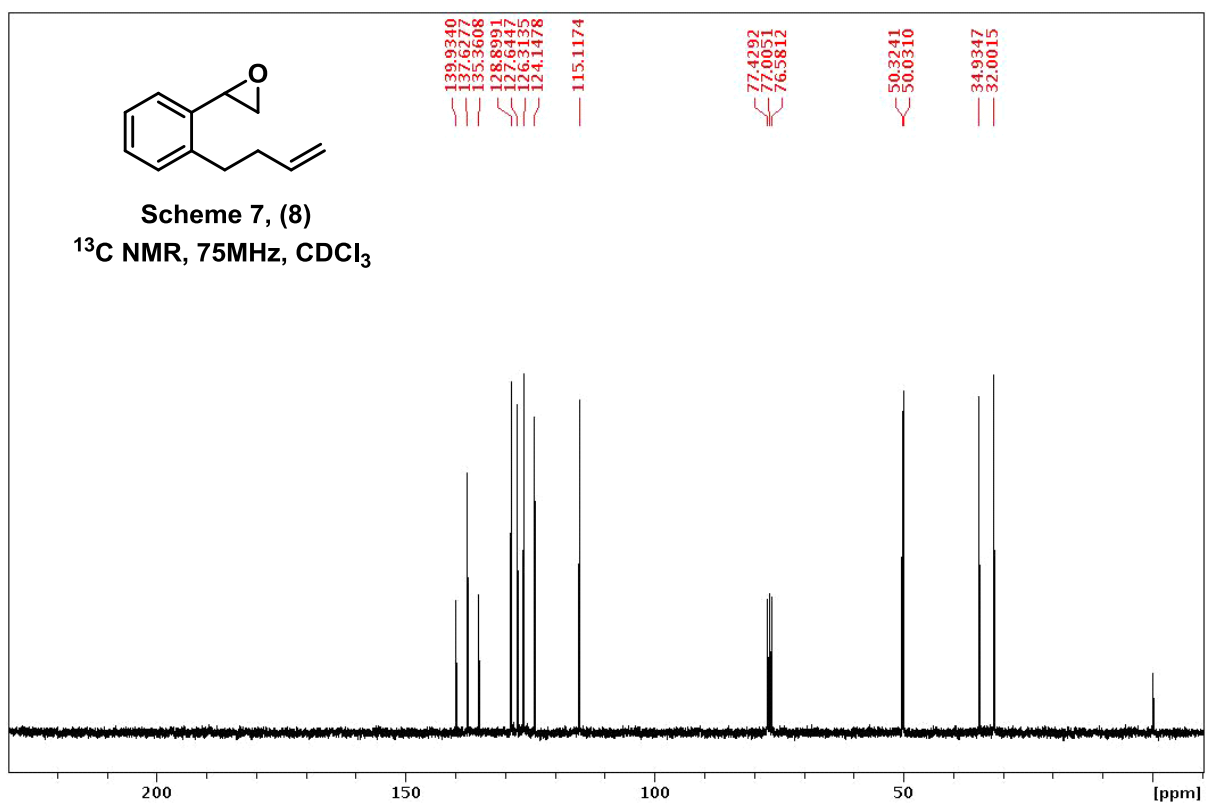

Supplement: Supplementary file 1 [file 4009909]
